# **Sparse genetic tracing reveals regionally specific functional organization of mammalian nociceptors**

William Olson<sup>1</sup>, Ishmail Abdus-Saboor<sup>1†</sup>, Lian Cui<sup>1†</sup>, Justin Burdge<sup>1</sup>, Tobias  
Raabe<sup>2</sup>, Minghong Ma<sup>1</sup>, and Wenqin Luo<sup>1\*</sup>

<sup>1</sup>Department of Neuroscience, Perelman School of Medicine, University of  
Pennsylvania, Philadelphia, PA 19104, USA

<sup>2</sup>Department of Genetics, Perelman School of Medicine, University of Pennsylvania,  
Philadelphia, PA 19104, USA

† These authors contributed equally to this work

\* **Corresponding author:** Wenqin Luo, MD, PhD, Department of Neuroscience,  
Perelman School of Medicine, University of Pennsylvania, 145 Johnson Pavilion,  
3610 Hamilton Walk, Philadelphia, PA 19104, USA. Email:  
[luow@mail.med.upenn.edu](mailto:luow@mail.med.upenn.edu)

## Abstract

The human distal limbs have a high spatial acuity for noxious stimuli but a low density of pain-sensing neurites. To elucidate mechanisms underlying the ‘pain fovea’, we sparsely traced non-peptidergic nociceptors across the body using a newly generated *MrgprD<sup>CreERT2</sup>* mouse line. We found that mouse plantar paw skin also has a low density of MrgprD<sup>+</sup> neurites, and individual arbors in different locations are comparable in size. Surprisingly, the central arbors of plantar paw and trunk innervating nociceptors have distinct morphologies in the spinal cord. This regional difference is well correlated with a heightened signal transmission for plantar paw circuits, as revealed by both spinal cord slice recordings and behavior assays. Taken together, our results elucidate a novel somatotopic functional organization of the mammalian pain system and suggest that regional central arbor structure could facilitate the magnification of plantar paw regions to contribute to the ‘pain fovea’.

## Introduction

The skin mediates physical contact with environmental mechanical, thermal, and chemical stimuli. As an animal moves through the world, certain parts of the skin are likely sites of “first contact” with these stimuli (for instance, the distal limbs, face/whiskers, and tail for quadrupedal mammals like mice). Therefore, these somatosensory regions require heightened sensitivity to fulfil behaviorally relevant functions, such as environment exploration.

Touch and pain are the two most important types of somatosensation for this functional purpose: touch allows for feature detection while pain prevents tissue damage. Indeed, classic work has defined important regional specialization of the nervous system for tactile sensation in these areas. Two mechanisms in the peripheral organization of the discriminative touch system facilitate high spatial acuity sensation in the primate distal limbs and mouse whisker pad. These are the *high innervation density* and *smaller receptive field sizes* of the primary light touch neurons, the A $\beta$  mechanoreceptors, in these regions<sup>1-7</sup>. In contrast, the question of whether regional specialization exists in the mammalian pain system has remained elusive until recently. Upon stimulation using nociceptive-specific laser beams, human subjects show a heightened spatial acuity in the distal limbs (especially the fingertips) for pain stimuli, much like they do for touch stimuli<sup>8-10</sup>. This suggests that this region is also a “pain fovea”. However, human fingertip skin has a relatively *low density of*

66 *pain-sensing neurites*<sup>9</sup>. While this suggests that region-specific organization likely  
67 exists in pain circuits downstream of the periphery (i.e. central nervous system),  
68 currently the exact neural mechanisms of the pain fovea are unclear.  
69  
70 Pain stimuli are detected by primary sensory neurons called nociceptors, which have  
71 cell bodies in the dorsal root ganglia (DRG) or trigeminal ganglia (TG) and axons that  
72 bifurcate into peripheral and central branches. The peripheral projection of a  
73 nociceptor usually terminates as a free nerve arbor in the skin or deeper tissues, while  
74 the central projection terminates in an arbor in the dorsal horn (DH) of the spinal cord  
75 or caudal medulla. Though previous work has mapped the peripheral receptive fields  
76 or traced the central terminals of mammalian nociceptors<sup>11-21</sup>, these studies have not  
77 established a model for the somatotopic functional organization of the mammalian  
78 pain system due to the limited number of neurons traced from restricted skin regions.  
79  
80 We therefore sought to reveal the region-specific organization of mammalian  
81 nociceptors across the entire somatotopic map. We generated a novel *MrgprD*<sup>CreERT2</sup>  
82 mouse line to perform systematic sparse genetic tracing of a population of  
83 non-peptidergic nociceptors that mediate mechanical pain and beta-alanine (B-AL)  
84 triggered itch<sup>22, 23</sup>. We chose these nociceptors because they are the most abundant  
85 type of cutaneous nociceptor and they likely correspond to the main type of free nerve  
86 terminals stained with anti-PGP9.5 antibody in previous human skin biopsy data<sup>9, 24</sup>.

Indeed, like the human skin biopsy results, we found that MrgprD<sup>+</sup> neurites have a comparatively low neurite density in plantar paw compared to trunk skin. In addition, and in contrast to the Aβ mechanoreceptors, sparse genetic tracing revealed that the arbor field sizes of individual nociceptors are comparable between different skin regions, whereas plantar paw and trunk innervating nociceptors display distinct morphologies in their central terminals. Lastly, using *MrgprD*<sup>CreERT2</sup>; *Rosa*<sup>Chr2-EYFP</sup> mice, we specifically activated these nociceptors using blue laser light during *in vitro* spinal cord slice recordings and during behavior assays. We found that, while almost all layer II DH neurons in all locations receive direct MrgprD<sup>+</sup> afferent input, the optical threshold required to induce postsynaptic responses is much lower in plantar paw regions. This was paralleled by a decrease in the light intensity threshold required to elicit a withdrawal response in paw, compared to upper thigh, skin stimulation. Collectively, we have identified a previously unappreciated somatotopic difference in the functional organization of mammalian nociceptors. Our anatomical, physiological, and behavior data suggest that region-specific central arbor structure could help to magnify the representation of plantar paw nociceptors in the DH to establish the ‘pain fovea’.

## Results

### Generation and specificity of *MrgprD*<sup>CreERT2</sup> mice

Given that previous descriptions of nociceptor structure have not allowed for

systematic comparisons between body regions, we sought to use sparse genetic labeling to trace single nociceptor morphologies across the entire somatotopic map. We generated a mouse line in which a tamoxifen-inducible Cre (CreERT2) cassette is knocked into the coding region of Mas-related gene product receptor D (*MrgprD*) (Figure 1A, Figure S1). Consistent with the previous finding that *MrgprD* is expressed more broadly in early development than in adulthood<sup>25</sup>, early embryonic (E16.5-E17.5) tamoxifen treatment of *MrgprD*<sup>CreERT2</sup> mice labels MrgprD<sup>+</sup> neurons along with non-peptidergic neurons expressing other *Mrgpr* genes, such as *MrgprA3* and *MrgprB4* (Figure S2). In contrast, when we crossed *MrgprD*<sup>CreERT2</sup> mice with a Cre-dependent *Rosa*<sup>ChR2-EYFP</sup> line and provided postnatal (P10-P17) tamoxifen treatment (Figure 1B), MrgprD<sup>+</sup> non-peptidergic nociceptors were specifically labeled. We examined these treated mice at 4 postnatal weeks or older (>4pw), a time point at which MrgprD<sup>+</sup> non-peptidergic nociceptors have completely segregated from other Mrgpr<sup>+</sup> DRG neurons<sup>25</sup>. We found that ChR2-EYFP<sup>+</sup> DRG neurons bind IB4 (a marker for non-peptidergic DRG neurons) but do not express CGRP (a marker for peptidergic DRG neurons)<sup>24</sup> (Figure 1C), and ChR2-EYFP<sup>+</sup> DH terminals similarly overlap with IB4 but not CGRP (Figure 1G). Double *in situ* hybridization demonstrated that this strategy efficiently labels DRG neurons expressing *MrgprD* ( $88.1 \pm 1\%$  of ChR2-EYFP<sup>+</sup> neurons,  $n = 3$  animals) but not those expressing *MrgprA3* ( $1.4 \pm 0.1\%$ ) or *MrgprB4* ( $0.4 \pm 0.3\%$ ) (Figure 1D-F). Almost all *MrgprD* expressing neurons were labeled with ChR2-EYFP ( $92.9 \pm 4.6\%$  of *MrgprD*<sup>+</sup>

neurons) by this treatment. Therefore, this newly generated inducible *MrgprD*<sup>CreERT2</sup> line allows for the specific and efficient targeting of adult *MrgprD*<sup>+</sup> nociceptors.

We then sought to trace individual *MrgprD*<sup>+</sup> non-peptidergic nociceptors using sparse genetic labeling. When crossed with a Cre-dependent alkaline phosphatase reporter line (*Rosa*<sup>iAP</sup>), we found that sparse recombination occurs in the absence of tamoxifen treatment (Figure 2A&B). This background recombination labels 3-11 neurons/DRG ( $5.2 \pm 1.6$  neurons/DRG,  $n = 47$  DRGs from 3 animals) in 3-4 pw animals (Figure 2C), which represents <1% of the total *MrgprD*<sup>+</sup> nociceptor population<sup>24, 26, 27</sup>. The sparsely labeled DRG neurons co-express non-peptidergic nociceptor markers peripherin, PAP<sup>28</sup>, and RET (Figure 2D, F, H), but do not express NF200 or CGRP (Figure 2E, G). To further determine the specificity of this sparse recombination, we used an *MrgprD*<sup>EGFPf</sup> knock-in line<sup>24</sup>, in which expression of EGFP mimics the dynamic expression of endogenous *MrgprD*. We generated *MrgprD*<sup>CreERT2/EGFPf</sup>; *Rosa*<sup>iAP</sup> mice and found that almost all AP<sup>+</sup> neurons co-express *MrgprD*<sup>EGFPf</sup> ( $93.7 \pm 2.3\%$ ,  $n = 126$  AP<sup>+</sup> neurons from 3 animals) (Figure 2I) in 3 to 4pw mice. This result indicates that, although *MrgprD* is broadly expressed during early development, this background recombination occurred preferentially in adult *MrgprD*<sup>+</sup> nociceptors.

**Genetic tracing of *MrgprD*<sup>+</sup> skin terminals reveals a relatively comparable organization in the periphery**

MrgprD<sup>+</sup> neurons innervate both hairy and glabrous skin and are the most abundant class of cutaneous free nerve arbors<sup>24</sup>. To systematically compare the peripheral single-cell structure of mammalian pain neurons across the somatotopic map, we performed whole mount colorimetric AP staining using untreated 3-4 pw *MrgprD<sup>CreERT2</sup>; Rosa<sup>iAP</sup>* skin.

We found that 98.4% (130/132 arbors,  $n = 4$  animals) of single-cell arbors have a “bushy ending” morphology (Figure 3A&B, D&E, Figure S3A)<sup>29</sup>, featuring thickened terminal structures in the epidermis. The distal ends of arbors in glabrous plantar paw skin have single, un-branched thickened neurites (Figure 3A&B), while arbors in the hairy skin feature both un-branched neurites as well as dense neurite clusters (Figure 3D&E). These dense clusters are seen in all analyzed regions that have hairy skin and likely innervate the necks of hair follicles (red arrowheads in Figure 3E&F) (see also Figure S5C)<sup>24</sup>. A very small minority (1.6%) of arbors in the hairy skin have “free endings”<sup>29</sup> lacking these thickened structures (Figure S3A-C).

MrgprD<sup>+</sup> non-peptidergic nociceptive field sizes range from 0.08 to 0.9 mm<sup>2</sup>, with the smallest average field size found in the head skin between the ears and in the proximal limbs (Table 1, Figure 3G). Interestingly, non-peptidergic nociceptors innervating the distal limbs (plantar and dorsal paw skin) have average arbor sizes close the middle of this range, and distal limb and trunk arbors are comparable in size



(Table 1, Figure 3G&H). In addition, consistent with human skin<sup>8</sup>, whole-population labeling of MrgprD<sup>+</sup> fibers using tamoxifen (0.5 mg at P11) reveals that the overall neurite density is slightly lower in the paw glabrous skin compared to trunk hairy skin (Figure 3C&F). In short, in contrast to mammalian A $\beta$  mechanoreceptors, plantar paw innervating mouse non-peptidergic nociceptors do not display higher neurite density or smaller receptive field sizes.

# **MrgprD<sup>+</sup> nociceptors show regionally distinct organization in their central arbors**

Since the peripheral organization of MrgprD<sup>+</sup> non-peptidergic nociceptors does not exhibit an obvious mechanism to facilitate heightened sensitivity in the plantar paw, we next used whole mount AP staining of untreated 3-4 pw *MrgprD<sup>CreERT2</sup>; Rosa<sup>iAP</sup>* spinal cords to compare their central arbors between regions. Non-peptidergic nociceptor central branches enter the spinal cord through the dorsal root, travel rostrally or caudally for 0 to 3 segments, and then dive ventrally to establish arbors in layer II of the DH (Table 2)<sup>24</sup>. Most MrgprD<sup>+</sup> central branches do not bifurcate (65.8%,  $n = 234$  neurons from 3 animals), and most also terminate within the segment of entry (72.6%) (Table 2). However, some (34.2%) bifurcate one or more times in the spinal cord, and some (27.3%) travel up to 3 segments from the point of entry (Table 2). For the central branches that bifurcate, most of their secondary/tertiary branches join other branches from the same neuron to co-form one axonal arbor,

while some end with a second arbor or terminate in the spinal cord without growing an arbor (Table 2, Figure S4A&B). The majority (91.9%) of labeled nociceptors have only one arbor, but a few have no (0.4%), 2 (6.8%), or 3 (0.9%) central arbors (Table 2).

Strikingly, MrgprD<sup>+</sup> non-peptidergic nociceptor central arbors display two different morphologies that can be distinguished by the ratio of their mediolateral width to their rostrocaudal height (W/H ratio) (Figure 4H). We defined arbors with W/H ratios >0.2 as “round” (Figure 4A-C, H, and Table 3) and arbors with W/H ratios <0.2 as “long and thin” (Figure 4B-F, H, and Table 3). Further, these morphological types are regionally segregated. Round arbors are found in DH regions known to represent the distal limbs (medial cervical and lumbar enlargements) as well as tail, anogenital (sacral DH), and head/face (descending trigeminal terminals in the upper cervical DH and medulla) skin (Figure 4B&C, H, J, and Figure S4C)<sup>30, 31</sup>. Long arbors are instead located in regions corresponding to the proximal limbs (lateral cervical and lumbar enlargements) and trunk skin (thoracic DH) (Figure 4B-F, H, J)<sup>30-32</sup>. While round and long arbors differ in morphology, they do not differ in area (Figure 4G).

In the cervical and lumbar enlargements (C3-C6, L3-L6), the medial DH contains a curved zone of round arbors that is encircled by laterally located long arbors (Figure 4C). Somatotopic mapping of the cat and rat DH indicates that this medial curved

zone in the lumbar enlargement matches the representation of the plantar paw and digits, with the dorsal paw and proximal limb representations lying more laterally<sup>30, 31, 33-38</sup>. We compared the number of labeled peripheral arbors in the toe and plantar paw skin with the number of round DH terminals in the corresponding half of the lumbar enlargement. This showed a very close correlation (Figure 4I), supporting that the round central arbors of the lumbar enlargement correspond to plantar paw and digit MrgprD<sup>+</sup> nociceptors, while nociceptors from other regions of the hindlimb (including dorsal hindpaw and proximal hindlimb) grow long central arbors located more laterally.

Since <1% of MrgprD<sup>+</sup> neurons are traced in these mice, it remains possible that this round-vs.-long arbor regional distinction may be an artifact of sparse labeling. For example, if both types were found throughout the DH but were differentially enriched between regions, sparse labeling might only trace the most prevalent type in each location. Using increasing dosages of tamoxifen, we found that these arbor types occupy mutually exclusive zones of the DH (Figure 5A-F). The maintained segregation of long and round arbors in the DH despite the increased number of AP<sup>+</sup> DRG neurons indicates that these arbor morphologies represent a true somatotopic distinction among MrgprD<sup>+</sup> non-peptidergic nociceptors.

**Neighboring non-peptidergic nociceptors highly overlap in the skin and spinal**

## cord

The axonal arbors of some somatosensory neurons have a non-overlapping arrangement between neighbors (“tiling”) in the body wall of the fly and zebrafish<sup>39, 40</sup>. To determine if mammalian non-peptidergic nociceptive arbors tile in the skin, we generated double knock-in *MrgprD*<sup>CreERT2/EGFPf</sup>; *Rosa*<sup>tdTomato</sup> mice. After low-dose tamoxifen treatment, sparsely labeled *MrgprD*<sup>+</sup> neurons in these mice express tdT while the entire population expresses EGFPf. The arbor fields of individual double tdT<sup>+</sup>/EGFP<sup>+</sup> neurons are always co-innervated by EGFP<sup>+</sup> only<sup>+</sup> fibers in both hairy and glabrous skin (Figure S5A-D), indicating that peripheral arbors of neighboring non-peptidergic nociceptors do not tile but instead overlap extensively. In hairy skin, sparse labeled tdT<sup>+</sup> neurites co-innervated hair follicles with EGFP-only<sup>+</sup> fibers, indicating that multiple *MrgprD*<sup>+</sup> neurons can innervate single hair follicles. Similarly, both round and long DH arbors of non-peptidergic nociceptors highly overlap with their neighbors in the DH (Figure S5E&F).

## Heightened signal transmission in the paw DH circuitry of *MrgprD*<sup>+</sup> neurons

Next, given the striking somatotopic differences in the central arbor organization of *MrgprD*<sup>+</sup> nociceptors, we asked whether we could find regional (plantar paw vs. trunk) differences in the transmission of sensory information at the level of the dorsal horn. We generated *MrgprD*<sup>CreERT2</sup>; *Rosa*<sup>ChR2-EYFP</sup> mice, which were treated with

postnatal tamoxifen (>P10, Figure 1), to compare the synaptic transmission of these neurons between somatotopic regions in spinal cord slice recordings. Comparable expression of ChR2-EYFP, as measured by the native fluorescence intensity, was found for *MrgprD*<sup>+</sup> neurons in thoracic (T9-T12) and hind limb-level (L3-L5) DRGs (Figure S6). We first used *MrgprD*<sup>CreERT2</sup>; *Rosa*<sup>ChR2-EYFP/ChR2-EYFP</sup> mice (carrying two copies of the *Rosa*<sup>ChR2-EYFP</sup> allele) to perform *in vitro* whole-cell patch-clamp recordings of layer II interneurons located in the territory innervated by ChR2-EYFP<sup>+</sup> fibers in transverse spinal cord sections (Fig. 6A). Light-evoked excitatory postsynaptic currents (EPSC<sub>LS</sub>) in these neurons could be differentiated into monosynaptic or polysynaptic responses based on latency, jitter, and response failure rate during 0.2 Hz blue light stimulation (Figure 6B&C)<sup>41</sup>. Almost all recorded neurons in both medial and lateral lumbar DH showed EPSC<sub>LS</sub> (Figure 6D, Table 4), with most cells (14/17 = 82.4% in medial lumbar, 14/16 = 86.5% in lateral lumbar) showing monosynaptic EPSC<sub>LS</sub> in both locations. This indicates that the majority of DH neurons in this innervation territory receive direct *MrgprD*<sup>+</sup> input, and that the incidence receiving direct input is equivalent for medial lumbar and lateral lumbar DH.

Given the very high level of ChR2 expression in these mice, any potential difference between the medial and lateral lumbar spinal cord may be masked by a “ceiling” effect. We therefore halved the genetic dosage of *Rosa*<sup>ChR2-EYFP</sup> by taking slices from

276 *MrgprD*<sup>CreERT2</sup>; *Rosa*<sup>ChR2-EYFP/+</sup> mice. Interestingly, we saw a dramatic difference when  
 277 comparing the medial and lateral lumbar DH of double heterozygous mice. Medial  
 278 lumbar DH neurons showed a much higher incidence of light responses than lateral  
 279 lumbar neurons, with a ~9-fold more (15/17 = 88.2% vs. 2/19 = 10.5%) in the  
 280 incidence of monosynaptic EPSC<sub>L</sub>s over lateral lumbar neurons (Figure 6E, Table 4).  
 281 Similar to the lateral lumbar DH, the incidence of monosynaptic EPSC<sub>L</sub>s of layer II  
 282 neurons in the medial and lateral thoracic region are also very low (1/11 = 9.1%)  
 283 (Figure 6E, Table 4). Moreover, even among responsive neurons, the pulse duration  
 284 threshold required to elicit EPSC<sub>L</sub>s was much longer in lateral lumbar and thoracic  
 285 DH neurons compared to medial lumbar neurons (Figure 6F). These results showed a  
 286 lower threshold for light-triggered excitatory currents in medial lumbar compared to  
 287 lateral lumbar and thoracic DH neurons, suggesting a heightened signal transmission  
 288 in plantar paw circuits. We repeated these recordings in sagittal spinal cord slices and  
 289 similarly found a higher EPSC<sub>L</sub> incidence in medial lumbar compared to lateral  
 290 lumbar or thoracic DH (Table 4). This confirms that these differences are not caused  
 291 by the different orientation of nociceptors in round vs. long arbor regions. Taken  
 292 together, our results show that, while most DH neurons in the *MrgprD*<sup>+</sup> innervation  
 293 territory receive direct *MrgprD*<sup>+</sup> input, the overall signal transmission is heightened in  
 294 plantar paw compared to trunk nociceptive circuits. This heightened transmission was  
 295 seen specifically at the level of nociceptor-to-DH neuron connections, and it  
 296 correlates closely with the region-specific organization of *MrgprD*<sup>+</sup> central arbors.

# **Plantar paw MrgprD<sup>+</sup> nociceptors have a lower stimulation threshold to induce avoidance behaviors**

Finally, since we saw a regional increase in signal transmission in plantar paw DH MrgprD<sup>+</sup> circuits, we asked whether this has functional relevance for a freely behaving animal. To activate ChR2 in skin-innervating nociceptors of behaving mice, we stimulated *MrgprD*<sup>CreERT2</sup>; *Rosa*<sup>ChR2-EYFP/ChR2-EYFP</sup> (*MrgprD-ChR2*) and *Rosa*<sup>ChR2-EYFP/ChR2-EYFP</sup> (*Control*) mice (P10-17 tamoxifen treatment) at both the paw and upper-thigh leg skin (Figure 7B&E) with either 473nm blue light or 532nm green light as a negative control. High levels of ChR2-EYFP were expressed in peripheral neurites in both plantar paw and upper leg skin (Figure 7A&D). Consistent with the AP labeling (Figure 3), upper leg skin shows a much higher density of EYFP+ neurites than the paw glabrous skin (Figure S6A-C).

We first stimulated the paw skin of both groups of mice with green light (5mW, 10 Hz, sine wave) and observed no avoidance behavior such as paw withdrawal (Figure 7C, Videos 1&2). When we stimulated both groups of mice with 1mW of blue light (10 Hz, sine wave), control mice did not respond, while 12.5% of *MrgprD-ChR2* mice displayed light-induced paw withdrawal (Figure 7B&C). When stimulated with 5mW blue light (10 Hz, sine wave), 100% of *MrgprD-ChR2* mice displayed clear light-induced avoidance behavior responses consisting of paw withdrawal, high

frequency paw shakes, occasional licking, extended holding of the paw in the air, and paw guarding. Control mice still did not respond (Figure 7B&C, Figure S7E, Videos 3&4).

Strikingly, when we activated MrgprD<sup>+</sup> neurites in the shaved upper-thigh skin, neither control nor *MrgprD-ChR2* mice responded to 5mW blue light (Figure 7E&F, S6E, Videos 5&6). Rather, to observe a fully penetrant avoidance behavior response in the upper-thigh of *MrgprD-ChR2* mice, the blue light power intensity had to be increased to 10 or 20 mW (2-4 times higher than the requirement in the paw) (Figure 7E-G, Videos 7&8). When taking the temporal delay of avoidance responses (Figure 7H) into consideration, 20mW intensity blue light is required at the leg to trigger responses comparable to 5mW intensity stimulation of the paw. In short, the light intensity threshold required to trigger an avoidance response is significantly lower in the paw compared to the upper-limb of *MrgprD-ChR2* mice.

Taken together, we have demonstrated a novel region-specific functional organization in the dorsal spinal cord for the mammalian pain system, which is consistent across anatomical, physiological, and behavioral levels.

## Discussion

In this study, we identified a novel somatotopic organization in the central arbors of



mammalian MrgprD<sup>+</sup> nociceptors, which is very well correlated with a regional increase in the sensitivity of paw nociceptive circuits to external stimuli. Our results suggest a model in which region-specific central arbor structure contributes to a sensory “fovea” for pain (Fig. 7I). In this model, the wider mediolateral spread of plantar paw nociceptor central arbors could facilitate “afferent magnification”<sup>42</sup> in downstream CNS circuits and facilitate heightened pain sensitivity of the plantar paw. Remarkably, two features of mouse non-peptidergic nociceptors revealed by our study, the peripheral neurite density distribution and the nociceptive fovea location (the distal limb), are consistent with findings in humans<sup>8-10</sup>. Therefore, the organizational mechanisms we discovered in mice are likely to be conserved in human, which provides a possible explanation for the human “pain fovea”.

### ***MrgprD*<sup>CreERT2</sup> allows for specific targeting of adult MrgprD<sup>+</sup> nociceptors**

Adult mice have two functionally distinct DRG neuronal populations expressing Mas-related gene product receptor (*Mrgpr*) genes. One expresses *MrgprA*, *MrgprB*, and *MrgprC* genes and the other only expresses *MrgprD*<sup>23, 25, 43-47</sup>. MrgprA/B/C<sup>+</sup> neurons also transiently express *MrgprD* during early development<sup>25</sup>. To specifically target MrgprD<sup>+</sup> neurons, we generated a new inducible *MrgprD*<sup>CreERT2</sup> mouse line that allows for temporally controlled recombination. We demonstrated that postnatal (P10 or later) tamoxifen treatment of *MrgprD*<sup>CreERT2</sup> mice specifically targets MrgprD<sup>+</sup> but not MrgprA/B/C<sup>+</sup> neurons (Figure 1).

360

361 To our advantage, we also found that sparse recombination in untreated

362 *MrgprD<sup>CreERT2</sup>; Rosa<sup>iAP</sup>* mice is very specific for MrgprD<sup>+</sup> neurons (~94% AP<sup>+</sup>

363 neurons are MrgprD<sup>+</sup>, Figure 2I). We noticed that most of this random recombination

364 likely occurs postnatally, as untreated *MrgprD<sup>CreERT2</sup>; Rosa<sup>iAP</sup>* tissue at P7 or younger

365 shows no AP<sup>+</sup> neurons (data not shown). This temporal delay of recombination, along

366 with the fact that there are many more adult MrgprD<sup>+</sup> than MrgprA/B/C<sup>+</sup> neurons<sup>25, 43,</sup>

367 <sup>45, 46</sup>, likely contributes to the specificity of sparse AP labeling in these mice.

368

369 In this paper, we used prenatal tamoxifen treatment of *MrgprD<sup>CreERT2</sup>* mice for two

370 experiments: *MrgprD<sup>CreERT2/EGFPf</sup>; Rosa<sup>tdTomato</sup>* labeling to show nociceptor overlap

371 (Figure S5) and increasing density labeling (Figure 5). In these experiments, both

372 MrgprD<sup>+</sup> and MrgprA/B/C<sup>+</sup> neurons could be targeted. For the overlap experiment,

373 neurites were chosen that had both red (*MrgprD<sup>CreERT2</sup>; Rosa<sup>tdTomato</sup>*) and green

374 (*MrgprD<sup>EGFPf</sup>*) fluorescence, indicating these were MrgprD<sup>+</sup> neurites. For the

375 increased density labeling experiment, even with high dosage (population-level)

376 prenatal tamoxifen treatment of this line, MrgprA/B/C<sup>+</sup> neurons make up <20% of the

377 total cells labeled (Figure S2). Given the nature of this experiment, we believe that

378 our interpretation is not confounded by this issue.

379

380 **Peripheral features of MrgprD<sup>+</sup> nociceptors show no obvious mechanism for the**

# **sensory “fovea”**

Though previous studies have traced various cutaneous somatosensory neurons, no systematic characterization of nociceptor morphology across the somatotopic map has been performed. In the periphery, sparse tracing of *Pou4f1* expressing somatosensory neurons (which includes almost all somatosensory DRG neuron classes<sup>48</sup>) in the back hairy revealed a “bushy ending” morphological type<sup>29</sup>. The authors suggested these terminals might correspond to C-fiber nociceptors or thermoceptors. In addition, MrgprB4<sup>+</sup> and TH<sup>+</sup> C fibers, which mainly mediate light touch but not pain, and innervate hairy skin only, have been genetically traced and analyzed<sup>46, 49</sup>. MrgprB4<sup>+</sup> neurons innervate the skin in large patches of free terminals<sup>46</sup>, while TH<sup>+</sup> neurons form lanceolate endings around hair follicles<sup>49</sup>. To our knowledge, single-cell tracing has not previously been performed for any C-fiber nociceptors innervating the glabrous skin.

MrgprD<sup>+</sup> nociceptors innervate both hairy and glabrous skin but not deep tissues<sup>24</sup>, making this population ideal for analysis of somatotopic differences. Our *MrgprD*<sup>CreERT2</sup> tracing reveals that MrgprD<sup>+</sup> nociceptors display a bushy-ending morphology in hairy skin and thickened endings in the epidermis in the glabrous skin (the plantar paw and finger tips) (Figure 3, Figure S3). Very rarely, we found “free ending” terminals that lack thickened epidermal ending (Figure S3). These match the morphology and size of MrgprB4<sup>+</sup> light touch neurons<sup>46</sup>, possibly indicating very rare

labeling of this subset. The fact that <2% of hairy skin terminals displayed this morphology further supports the specificity of *MrgprD*<sup>CreERT2</sup> sparse recombination.

Using genetic tracing, we found that (1) the density of *MrgprD*<sup>+</sup> C fiber nociceptive neurites is slightly lower in paw (including digit tips) compared to trunk skin and (2) paw and trunk terminals are comparable in the overall area (Figure 3). This second result contrasts with an earlier study that performed single-fiber recordings of human mechanically responsive C-fiber units, which saw smaller receptive fields in the distal leg<sup>11</sup>. This discrepancy could be caused by differences between species, techniques (physiological vs. direct anatomic tracing), or the composition of neurons that were analyzed (the previous study presumably recorded from multiple molecular classes). In short, in our analysis of *MrgprD*<sup>+</sup> nociceptors, we did not find any obvious peripheral mechanism that might readily explain the heightened pain acuity of the distal limbs seen in human subjects or the increased sensitivity of the mouse plantar paw to *in vivo* optogenetic skin stimulation (Figure 7).

#### ***MrgprD*<sup>+</sup> nociceptors display region specific organization of central circuits**

Classic studies have characterized the single-cell central arbors of C-fiber afferents using Golgi staining or backfill techniques and described them as longitudinally-oriented “thin sheets” that are short in the mediolateral axis and extended in the rostrocaudal axis<sup>18, 19, 50</sup>. This description corresponds well to the

“long arbors” we found in DH zones representing proximal limb and trunk regions (Figure 4). The central terminals of MrgprB4<sup>+</sup> and TH<sup>+</sup> C-fiber light touch neurons also match this long terminal morphology, consistent with the fact that these classes only innervate hairy skin<sup>46, 49</sup>. Nevertheless, a systematic comparison of nociceptive central terminals across the entire somatotopic map has not been conducted.

Here, we found regionally distinctive central arbor organization among MrgprD<sup>+</sup> nociceptors; those innervating the distal limbs, tail, anogenital skin, and the head/face display round central terminals, while those innervating the trunk hairy skin display long and thin central arbors (Figure 4). Given that neurons in the medulla and sacral spinal cord display round arbors (Figure 4 and S4C), this morphological difference does not correlate with hairy vs. glabrous skin regions but instead seems to correlate with regions located at the extremities. In addition, we found that regions with round arbors showed an increased signal transmission onto downstream neurons, and a heightened sensitivity to external stimulation (Figures 6, 7, and S7). These results suggest that region specific central arbors of MrgprD<sup>+</sup> nociceptors are an important component for the region-specific spinal cord circuits. Taken together, we have uncovered a novel form of region-specific functional organization for mammalian nociceptors.

Some previous studies suggest that the third-order DH collaterals of A $\beta$  mechanoreceptors are also wider (in the mediolateral axis) in the medial lumbar enlargement compared to other DH regions<sup>34, 51, 52</sup>. However, the primary signal transmission for discriminative information occurs in the dorsal column nuclei but not the dorsal spinal cord. Thus, it is currently less clear whether this central arbor morphological difference contributes to differential touch sensitivity.

# **Region-specific DH circuit organization leads to an increased sensitivity of paw pain circuits to external input**

Finally, we determined the stimulus threshold (laser power) required to trigger avoidance behaviors of freely behaving *MrgprD-ChR2* mice upon paw or upper leg skin light stimulation. While 100% of tested animals showed withdrawal responses when 5 mW blue light was applied to the plantar paw, a 4-fold increase in light intensity (20 mW) was required to trigger comparable responses (in terms of rate and latency) in the upper leg (Figure 7, Figure S6B). Thus, our experiments show a clear heightened sensitivity of plantar-paw-innervating *MrgprD*<sup>+</sup> nociceptors to stimulation. Interestingly, our use of peripheral optogenetic stimulation likely bypasses the effects of some peripheral parameters, such as the physical properties of the skin or the expression of molecular receptors, on the sensation of natural stimuli. Thus, this approach allowed us to more directly compare and probe the effects of circuit organization mechanisms on region-specific sensitivity.

464

465 Collectively, our results suggest that region-specific MrgprD<sup>+</sup> central arbor  
 466 organization could magnify the representation of the plantar paw within pain circuits  
 467 to contribute to a nociceptive “fovea”<sup>52</sup> (Figure 7I). This central organization  
 468 mechanism could allow for the sensitive detection of harmful stimuli in these areas,  
 469 despite a lower neurite density in the periphery. This finding is relevant for pain  
 470 research using mouse models, which has historically relied heavily on pain assays in  
 471 plantar paw/medial lumbar circuits<sup>53</sup>. Given our findings, it would be interesting to  
 472 examine whether region-specific differences exist in the molecular and physiological  
 473 pathways of acute and/or chronic pain models. Such work could be informative for  
 474 the translation of preclinical models to clinical treatment.

475

476

477

478

479

480

481

482

483

484

## Online Methods

### Mouse strains:

Mice were raised in a barrier facility in Hill Pavilion, University of Pennsylvania. All procedures were conducted according to animal protocols approved by Institutional Animal Care and Use Committee (IACUC) of the University of Pennsylvania and National Institutes of Health guidelines. *Rosa<sup>tdTomato</sup>*, *Rosa<sup>iAP</sup>*, *Rosa<sup>ChR2-EYFP</sup>*, and *MrgprD<sup>EGFPf</sup>* lines have been described previously<sup>24, 54-56</sup>.

### Generation of *MrgprD<sup>CreERT2</sup>* mice:

Targeting construct arms were subcloned from a C57BL/6J BAC clone (RP24-316N16) using BAC recombineering, and the CreERT2 coding sequence followed by a FRT-flanked neomycin-resistance selection cassette was engineered in-frame following the *MrgprD* starting codon by the same approach (Figure S1A). The targeting construct was electroporated into a C57/129 hybrid (V6.5) mouse embryonic stem cell line by the Penn Gene Targeting Core. ES clones were screened by PCR using primers flanking the 3' insertion site (Figure S1C). Positive clones were further screened using Southern blot with both internal and external probes (Figure S1B). The Penn Transgenic Core assisted in *MrgprD<sup>CreERT2</sup>* ES clone blastocyst injection and in the generation of chimeric mice, which were mated to a *Rosa<sup>Flippase</sup>* line (Jax 007844) to excise the Neo cassette. Neo cassette-negative progeny (verified via PCR of genomic DNA) were mated to C57 or CD1 mice to establish the line.



506

507 **Genetic labeling of MrgprD<sup>+</sup> nociceptors:**

508 To label MrgprD<sup>+</sup> nociceptors, *MrgprD*<sup>CreERT2</sup> mice carrying the relevant reporter  
 509 allele were treated with tamoxifen (Sigma, T5648) pre- or postnatally. For prenatal  
 510 treatment, pregnant females were given tamoxifen along with estradiol (Sigma,  
 511 E8875, at a 1:1000 mass estradiol: mass tamoxifen ratio) and progesterone (Sigma,  
 512 P3972, at a 1:2 mass progesterone: mass tamoxifen ratio) in sunflower seed oil via  
 513 oral gavage at E16.5-E17.5, when *MrgprD* is highly expressed in mouse  
 514 non-peptidergic nociceptors<sup>57</sup>. For postnatal treatment, 0.5mg tamoxifen extracted in  
 515 sunflower seed oil was given via i.p. injection once per day from P10-P17 (or  
 516 P14-P21 for spinal cord slice recording experiments, Figure 6). At least one week was  
 517 given to drive recombination and reporter gene expression.

518

519 **Tissue preparation and histology:**

520 Procedures were conducted as previously described<sup>58</sup>. Briefly, mice used for  
 521 immunostaining or AP staining were euthanized with CO<sub>2</sub> and transcardially perfused  
 522 with 4% PFA/PBS, and dissected tissue (either skin or spinal cord and DRGs) was  
 523 post-fixed for 2 hr in 4% PFA/PBS at 4° C. Tissue used for immunostaining was  
 524 cryo-protected in 30% sucrose/PBS (4% overnight) before freezing. Mice used for *in*  
 525 *situ* hybridization were euthanized and unfixed dissected tissue was frozen. Frozen  
 526 glabrous skin and DRG/spinal cord sections (20-30 μm) were cut on a Leica CM1950

cryostat. Immunostaining of sectioned DRG, spinal cord, and glabrous skin tissue, whole mount skin immunostaining, and double fluorescence *in situ* hybridization was performed as described previously<sup>58, 59</sup>. The following antibodies and dyes were used: chicken anti-GFP (Aves, GFP-1020), rabbit anti-GFP (Invitrogen, A-11122), rabbit anti-NF200 (Sigma, N4142), rabbit anti-CGRP (Immunostar, 24112), conjugated IB4-Alex488 (Molecular Probes, I21411), chicken anti-peripherin (Aves, PER), chicken anti-PAP (Aves, PAP), mouse anti-PKC $\gamma$  (Novex, 13-3800), rabbit anti-RET (IBL, 18121), rabbit anti-RFP (Chemicon, AB3216). *MrgprD*, *MrgprA3*, and *MrgprB4* *in situ* probes were previously described<sup>60</sup>.

Tissue (skin or spinal cord with attached DRGs) for whole mount AP colorimetric staining with BCIP/NBT substrate (Roche, 1138221001 and 11383213001) and for fluorescent staining with HNPP/FastRed substrate (Roche, 11758888001) was treated as previously described<sup>59</sup>. Following AP colorimetric labeling, tissue was either cleared in BABB for imaging or sectioned using a VT1200S vibratome (Leica Microsystems, Nussloch, Germany) (200  $\mu$ m), followed by BABB clearing for imaging. Fluorescent labeled DRGs co-stained using antibodies were cleared in glycerol and for imaging.

## Electrophysiology

547 Spinal cord slices recordings were conducted as previously described<sup>61</sup>. Basically,  
 548 4-6pw *MrgprD*<sup>CreERT2</sup>; *Rosa*<sup>ChR2-EYFP/ChR2-EYFP</sup> or *MrgprD*<sup>CreERT2</sup>; *Rosa*<sup>ChR2-EYFP/+</sup> mice  
 549 were anesthetized with a ketamine/xylazine/acepromazine cocktail. Laminectomy was  
 550 performed, and the spinal cord lumbar segments were removed and placed in ice-cold  
 551 incubation solution consisting of (in mM) 95 NaCl, 1.8 KCl, 1.2 KH<sub>2</sub>PO<sub>4</sub>, 0.5 CaCl<sub>2</sub>, 7  
 552 MgSO<sub>4</sub>, 26 NaHCO<sub>3</sub>, 15 glucose, and 50 sucrose, oxygenated with 95% O<sub>2</sub> and 5%  
 553 CO<sub>2</sub>, at a pH of 7.35–7.45 and an osmolality of 310–320 mosM. Sagittal or transverse  
 554 spinal cord slices (300–500 μm thick) were prepared using a VT1200S vibratome  
 555 (Leica Microsystems, Nussloch, Germany) and incubated in 34°C incubation solution  
 556 for 30 min.

557

558 The slice was transferred to the recording chamber and continuously perfused with  
 559 recording solution at a rate of 3–4 ml/min. The recording solution consisted of (in mM)  
 560 127 NaCl, 1.8 KCl, 1.2 KH<sub>2</sub>PO<sub>4</sub>, 2.4 CaCl<sub>2</sub>, 1.3 MgSO<sub>4</sub>, 26 NaHCO<sub>3</sub>, and 15 glucose,  
 561 oxygenated with 95% O<sub>2</sub> and 5% CO<sub>2</sub>, at a pH of 7.35–7.45 and an osmolality of 300–  
 562 310 mosM. Recordings were performed at RT. Spinal cord slices were visualized with  
 563 an Olympus BX 61WI microscope (Olympus Optical, Tokyo, Japan), and the  
 564 substantia gelatinosa (lamina II), which is a translucent band across the dorsal horn,  
 565 was used as a landmark. Fluorescently labeled ChR2-EYFP terminals in the DH were  
 566 identified by epifluorescence, and neurons in this innervation territory were recorded in  
 567 the whole cell patch-clamp configuration. Glass pipettes (3–5 MΩ) were filled with

internal solution consisting of (in mM) 120 K-gluconate, 10 KCl, 2 MgATP, 0.5 NaGTP, 20 HEPES, 0.5 EGTA, and 10 phosphocreatine di(tris) salt at a pH of 7.29 and an osmolality of 300 mosM. All data were acquired using an EPC-9 patch-clamp amplifier and Pulse software (HEKA, Freiburg, Germany). Liquid junction potentials were not corrected. The series resistance was between 10 and 25 MΩ.

Light induced EPSCs (EPSC<sub>LS</sub>) were elicited at a frequency of 2/min by 473nm laser illumination (10 mW, 0.1-5ms, Blue Sky Research, Milpitas, USA). Blue light was delivered through a 40X water-immersion microscope objective. Mono- or polysynaptic EPSC<sub>LS</sub> were differentiated by 0.2 Hz light stimulation. We classified a connection as monosynaptic if the EPSC jitter (average standard deviation of the light-induced EPSCs latency from stimulation) < 1.6 ms<sup>62, 63</sup>.

### **Optogenetic stimulation of MrgprD<sup>+</sup> nociceptors in paw and leg skin**

To induce light-evoked behavior in freely moving animals, we used P10-P17 tamoxifen treated *MrgprD*<sup>CreERT2</sup>; *Rosa*<sup>ChR2-EYFP/ChR2-EYFP</sup> mice and control littermates (*Rosa*<sup>ChR2-EYFP/ChR2-EYFP</sup>) who were also tamoxifen treated, but lacked the Cre-driver. All tested animals were between 2-6 months old. An additional control was to shine 532nm green laser light (Shanghai Laser and Optics Century, GL532T8-1000FC/ADR-800A) to the paw skin of both experimental groups. To induce light-evoked aversive behavior in MrgprD<sup>+</sup> neurites in the paw skin, 1 or 5mW

of 473nm blue light laser (Shanghai Laser and Optics Century,  
BL473T8-150FC/ADR-800A) was shined directly to the paw skin through a mesh  
bottom floor, with a cutoff time of 10 seconds. We tested different light waveforms  
and found that 10Hz sine waveform pulsing gave the best behavior responses. Thus,  
we used this waveform for all our behavior tests.

To induce light-evoked aversive behavior in MrgprD<sup>+</sup> neurites in the leg skin, first, all  
hair was removed from the leg with Nair hair remover under light 3% isoflourane  
anesthesia, and animals were given two days before being tested again. For leg  
stimulation, 1, 5, 10, or 20mW of 473nm blue light laser, with 10Hz sine waveform  
pulsing, was shined directly to the leg skin. The cutoff time for this behavior assay is  
10 seconds. For habituation to either paw or leg skin light stimulation, on the first two  
days, animals were habituated to the testing paradigm by being placed in the  
plexiglass testing chamber (11.5×11.5×16 cm) for 30 minutes each day. On the third  
testing day, animals were placed in the plexiglass testing chamber for 15 minutes  
prior to light stimulation. Green and blue light testing were performed on different  
days, but two weeks separated the paw and leg skin light stimulation. For all  
stimulation, the laser light was delivered via an FC/PC Optogenetic Patch Cable with  
a 200micrometer core opening (ThorLabs) and there was approximately 1cm of space  
between the cable terminal and the targeted skin area. Light power intensity for each  
experiment was measured with a Digital Power Meter with a 9.5mm aperture

(ThorLabs). For leg skin stimulation, power intensity was only slightly impeded by the thin wall (0.02cm) of the plexiglass holding chamber, as measured by the Digital Power Meter (Figure 7D).

To gain precise spatial and temporal resolution of behavior responses, we recorded behaving animals at 500 frames/second with a high-speed camera (FASTCAM UX100 800K-M-4GB - Monochrome 800K with 4GB memory) and attached lens (Nikon Zoom Wide Angle Telephoto 24-85mm f2.8). With a tripod with geared head for Photron UX100, the camera was placed at a ~45degree angle at ~1-2 feet away from the plexiglass holding chambers where mice performed behaviors. The camera was maximally activated with far-red shifted 10mW LED light that did not disturb animal behavior. All data were collected and annotated on a Dell laptop computer with Fastcam NI DAQ software that is designed to synchronize Photron slow motion cameras with the M series integrated BNC Data Acquisition (DAQ) units from National Instruments.

#### **Image acquisition and data analysis:**

Images were acquired either on a Leica DM5000B microscope (bright field with a Leica DFC 295 camera and fluorescent with a Leica 345 FX camera), on a Leica SP5II confocal microscope (fluorescent), or on a Leica M205 C stereoscope with a Leica DFC 450 C camera (bright field). Image manipulation and figure generation

were performed in ImageJ, Adobe Photoshop and Adobe Illustrator. Cell number counting, nociceptor arbor measurements, and fluorescence measurements were performed in ImageJ. For section histology experiments,  $n = 3-6$  sections per animal from 3 animals. Central arbor height/width measurements were taken to be the relevant axes of fitted ellipses. Column graphs, pie charts and scatter plots were generated in GraphPad Prism5. Column graphs show mean  $\pm$  SEM. Statistical significance was analyzed using Student's  $t$ -tests, one-way ANOVA with Tukey's multiple comparisons or Chi-square tests in GraphPad Prism5. For DRG fluorescence intensity measurements, the average fluorescence of outlined cells was normalized to background fluorescence (Figure S6).

# **Acknowledgements:**

We thank Peter Dong for illustrating the model in Figure 7. We also thank Greg Bashaw for reading and providing suggestions for this manuscript. This work was supported by National Institutes of Health (NIH) grant (NS083702, NS094224) and the Klingenstein-Simons Fellowship Award in the Neurosciences to W.L. and by NIH grant (NS092297) to W.O. I.A.S. was supported by NIH grant (K12GM081259) and Burroughs Wellcome Fund grant PDEP.

# **Author Contributions:**

652 W.O., I.A.S., L.C., M.M. and W.L. contributed to experimental design and  
 653 interpretation. W.O. performed most of the histological experiments in this paper.  
 654 L.C. performed the spinal cord slice recording experiments. I.A.S. and J.B. performed  
 655 the optogenetic behavior assays. W.O., I.A.S., L.C., M.M. and W.L. wrote and  
 656 revised this manuscript.

657

658



## References:

1. Johansson, R.S. & Vallbo, A.B. Tactile sensibility in the human hand: relative and absolute densities of four types of mechanoreceptive units in glabrous skin. *J Physiol* **286**, 283-300 (1979).
2. Johansson, R.S. & Vallbo, A.B. Spatial properties of the population of mechanoreceptive units in the glabrous skin of the human hand. *Brain Res* **184**, 353-366 (1980).
3. Brown, P.B. & Koerber, H.R. Cat hindlimb tactile dermatomes determined with single-unit recordings. *J Neurophysiol* **41**, 260-267 (1978).
4. Weinstein, S. Intensive and Extensive Aspects of Tactile Sensitivity as a Function of Body Part, Sex and Laterality. in *The Skin Senses* (ed. D.R. Kenshalo) 195-218 (Charles C. Thomas Publishing, Springfield, IL, 1968).
5. Brown, P.B., Koerber, H.R. & Millecchia, R. From innervation density to tactile acuity: 1. Spatial representation. *Brain Res* **1011**, 14-32 (2004).
6. Pare, M., Smith, A.M. & Rice, F.L. Distribution and terminal arborizations of cutaneous mechanoreceptors in the glabrous finger pads of the monkey. *J Comp Neurol* **445**, 347-359 (2002).
7. Rice, F.L., Kinnman, E., Aldskogius, H., Johansson, O. & Arvidsson, J. The innervation of the mystacial pad of the rat as revealed by PGP 9.5 immunofluorescence. *J Comp Neurol* **337**, 366-385 (1993).
8. Mancini, F., Haggard, P., Iannetti, G.D., Longo, M.R. & Sereno, M.I. Fine-grained nociceptive maps in primary somatosensory cortex. *J Neurosci* **32**, 17155-17162 (2012).
9. Mancini, F., *et al.* A fovea for pain at the fingertips. *Curr Biol* **23**, 496-500 (2013).
10. Mancini, F., *et al.* Whole-body mapping of spatial acuity for pain and touch. *Ann Neurol* **75**, 917-924 (2014).
11. Schmidt, R., Schmelz, M., Ringkamp, M., Handwerker, H.O. & Torebjork, H.E. Innervation territories of mechanically activated C nociceptor units in human skin. *J Neurophysiol* **78**, 2641-2648 (1997).
12. Schmidt, R., Schmelz, M., Weidner, C., Handwerker, H.O. & Torebjork, H.E. Innervation territories of mechano-insensitive C nociceptors in human skin. *J Neurophysiol* **88**, 1859-1866 (2002).
13. Bessou, P. & Perl, E.R. Response of cutaneous sensory units with unmyelinated fibers to noxious stimuli. *J Neurophysiol* **32**, 1025-1043 (1969).
14. Beitel, R.E. & Dubner, R. Response of unmyelinated (C) polymodal nociceptors to thermal stimuli applied to monkey's face. *J Neurophysiol* **39**, 1160-1175 (1976).
15. Treede, R.D., Meyer, R.A. & Campbell, J.N. Comparison of heat and mechanical receptive fields of cutaneous C-fiber nociceptors in monkey. *J Neurophysiol* **64**, 1502-1513 (1990).

- 699 16. Lynn, B. & Carpenter, S.E. Primary afferent units from the hairy skin of the rat  
700 hind limb. *Brain Res* **238**, 29-43 (1982).
- 701 17. Lynn, B. & Shakhaneh, J. Properties of A delta high threshold  
702 mechanoreceptors in the rat hairy and glabrous skin and their response to heat.  
703 *Neurosci Lett* **85**, 71-76 (1988).
- 704 18. Sugiura, Y., Lee, C.L. & Perl, E.R. Central projections of identified,  
705 unmyelinated (C) afferent fibers innervating mammalian skin. *Science* **234**, 358-361  
706 (1986).
- 707 19. Sugiura, Y., Terui, N. & Hosoya, Y. Difference in distribution of central  
708 terminals between visceral and somatic unmyelinated (C) primary afferent fibers. *J*  
709 *Neurophysiol* **62**, 834-840 (1989).
- 710 20. Szentagothai, J. Neuronal and Synaptic Arrangement in the Substantia Gelatinosa  
711 Rolandi. *J Comp Neurol* **122**, 219-239 (1964).
- 712 21. Rethelyi, M. Preterminal and terminal axon arborizations in the substantia  
713 gelatinosa of cat's spinal cord. *J Comp Neurol* **172**, 511-521 (1977).
- 714 22. Cavanaugh, D.J., *et al.* Distinct subsets of unmyelinated primary sensory fibers  
715 mediate behavioral responses to noxious thermal and mechanical stimuli. *Proc Natl*  
716 *Acad Sci U S A* **106**, 9075-9080 (2009).
- 717 23. Liu, Q., *et al.* Mechanisms of itch evoked by beta-alanine. *J Neurosci* **32**,  
718 14532-14537 (2012).
- 719 24. Zylka, M.J., Rice, F.L. & Anderson, D.J. Topographically distinct epidermal  
720 nociceptive circuits revealed by axonal tracers targeted to Mrgprd. *Neuron* **45**, 17-25  
721 (2005).
- 722 25. Liu, Y., *et al.* Mechanisms of compartmentalized expression of Mrg class  
723 G-protein-coupled sensory receptors. *J Neurosci* **28**, 125-132 (2008).
- 724 26. Wright, D.E., Zhou, L., Kucera, J. & Snider, W.D. Introduction of a  
725 neurotrophin-3 transgene into muscle selectively rescues proprioceptive neurons in  
726 mice lacking endogenous neurotrophin-3. *Neuron* **19**, 503-517 (1997).
- 727 27. Molliver, D.C., *et al.* IB4-binding DRG neurons switch from NGF to GDNF  
728 dependence in early postnatal life. *Neuron* **19**, 849-861 (1997).
- 729 28. Zylka, M.J., *et al.* Prostatic acid phosphatase is an ectonucleotidase and  
730 suppresses pain by generating adenosine. *Neuron* **60**, 111-122 (2008).
- 731 29. Wu, H., Williams, J. & Nathans, J. Morphologic diversity of cutaneous sensory  
732 afferents revealed by genetically directed sparse labeling. *Elife* **1**, e00181 (2012).
- 733 30. Koerber, H.R. & Brown, P.B. Somatotopic organization of hindlimb cutaneous  
734 nerve projections to cat dorsal horn. *J Neurophysiol* **48**, 481-489 (1982).
- 735 31. Molander, C. & Grant, G. Cutaneous projections from the rat hindlimb foot to the  
736 substantia gelatinosa of the spinal cord studied by transganglionic transport of  
737 WGA-HRP conjugate. *J Comp Neurol* **237**, 476-484 (1985).
- 738 32. Cervero, F. & Connell, L.A. Distribution of somatic and visceral primary afferent  
739 fibres within the thoracic spinal cord of the cat. *J Comp Neurol* **230**, 88-98 (1984).

- 740 33. Brown, P.B. & Fuchs, J.L. Somatotopic representation of hindlimb skin in cat  
741 dorsal horn. *J Neurophysiol* **38**, 1-9 (1975).
- 742 34. Brown, P.B., *et al.* Somatotopic organization of single primary afferent axon  
743 projections to cat spinal cord dorsal horn. *J Neurosci* **11**, 298-309 (1991).
- 744 35. Swett, J.E. & Woolf, C.J. The somatotopic organization of primary afferent  
745 terminals in the superficial laminae of the dorsal horn of the rat spinal cord. *J Comp*  
746 *Neurol* **231**, 66-77 (1985).
- 747 36. Takahashi, Y., *et al.* Organization of cutaneous ventrodorsal and rostrocaudal  
748 axial lines in the rat hindlimb and trunk in the dorsal horn of the spinal cord. *J Comp*  
749 *Neurol* **445**, 133-144 (2002).
- 750 37. Takahashi, Y., Aoki, Y. & Doya, H. Segmental somatotopic organization of  
751 cutaneous afferent fibers in the lumbar spinal cord dorsal horn in rats. *Anat Sci Int* **82**,  
752 24-30 (2007).
- 753 38. Woolf, C.J. & Fitzgerald, M. Somatotopic organization of cutaneous afferent  
754 terminals and dorsal horn neuronal receptive fields in the superficial and deep laminae  
755 of the rat lumbar spinal cord. *J Comp Neurol* **251**, 517-531 (1986).
- 756 39. Grueber, W.B., Jan, L.Y. & Jan, Y.N. Tiling of the Drosophila epidermis by  
757 multidendritic sensory neurons. *Development* **129**, 2867-2878 (2002).
- 758 40. Sagasti, A., Guido, M.R., Raible, D.W. & Schier, A.F. Repulsive interactions  
759 shape the morphologies and functional arrangement of zebrafish peripheral sensory  
760 arbors. *Curr Biol* **15**, 804-814 (2005).
- 761 41. Cui, L., *et al.* Identification of Early RET+ Deep Dorsal Spinal Cord Interneurons  
762 in Gating Pain. *Neuron* **91**, 1137-1153 (2016).
- 763 42. Catania, K.C. & Kaas, J.H. Somatosensory fovea in the star-nosed mole:  
764 behavioral use of the star in relation to innervation patterns and cortical  
765 representation. *J Comp Neurol* **387**, 215-233 (1997).
- 766 43. Dong, X., Han, S., Zylka, M.J., Simon, M.I. & Anderson, D.J. A diverse family  
767 of GPCRs expressed in specific subsets of nociceptive sensory neurons. *Cell* **106**,  
768 619-632 (2001).
- 769 44. Han, L., *et al.* A subpopulation of nociceptors specifically linked to itch. *Nat*  
770 *Neurosci* **16**, 174-182 (2013).
- 771 45. Liu, Q., *et al.* Sensory neuron-specific GPCR Mrgprs are itch receptors mediating  
772 chloroquine-induced pruritus. *Cell* **139**, 1353-1365 (2009).
- 773 46. Liu, Q., *et al.* Molecular genetic visualization of a rare subset of unmyelinated  
774 sensory neurons that may detect gentle touch. *Nat Neurosci* **10**, 946-948 (2007).
- 775 47. Zylka, M.J., Dong, X., Southwell, A.L. & Anderson, D.J. Atypical expansion in  
776 mice of the sensory neuron-specific Mrg G protein-coupled receptor family. *Proc Natl*  
777 *Acad Sci U S A* **100**, 10043-10048 (2003).
- 778 48. Badea, T.C., *et al.* Combinatorial expression of Brn3 transcription factors in  
779 somatosensory neurons: genetic and morphologic analysis. *J Neurosci* **32**, 995-1007  
780 (2012).

49. Li, L., *et al.* The functional organization of cutaneous low-threshold mechanosensory neurons. *Cell* **147**, 1615-1627 (2011).
50. Scheibel, M.E. & Scheibel, A.B. Terminal axonal patterns in cat spinal cord. II. The dorsal horn. *Brain Res* **9**, 32-58 (1968).
51. Shortland, P., Woolf, C.J. & Fitzgerald, M. Morphology and somatotopic organization of the central terminals of hindlimb hair follicle afferents in the rat lumbar spinal cord. *J Comp Neurol* **289**, 416-433 (1989).
52. Millecchia, R.J., *et al.* Influence of map scale on primary afferent terminal field geometry in cat dorsal horn. *J Neurophysiol* **66**, 696-704 (1991).
53. Le Bars, D., Gozariu, M. & Cadden, S.W. Animal models of nociception. *Pharmacol Rev* **53**, 597-652 (2001).
54. Badea, T.C., *et al.* New mouse lines for the analysis of neuronal morphology using CreER(T)/loxP-directed sparse labeling. *PLoS One* **4**, e7859 (2009).
55. Madisen, L., *et al.* A robust and high-throughput Cre reporting and characterization system for the whole mouse brain. *Nat Neurosci* **13**, 133-140 (2010).
56. Madisen, L., *et al.* A toolbox of Cre-dependent optogenetic transgenic mice for light-induced activation and silencing. *Nat Neurosci* **15**, 793-802 (2012).
57. Chen, C.L., *et al.* Runx1 determines nociceptive sensory neuron phenotype and is required for thermal and neuropathic pain. *Neuron* **49**, 365-377 (2006).
58. Fleming, M.S., *et al.* The majority of dorsal spinal cord gastrin releasing peptide is synthesized locally whereas neuromedin B is highly expressed in pain- and itch-sensing somatosensory neurons. *Mol Pain* **8**, 52 (2012).
59. Niu, J., *et al.* Modality-based organization of ascending somatosensory axons in the direct dorsal column pathway. *J Neurosci* **33**, 17691-17709 (2013).
60. Luo, W., *et al.* A hierarchical NGF signaling cascade controls Ret-dependent and Ret-independent events during development of nonpeptidergic DRG neurons. *Neuron* **54**, 739-754 (2007).
61. Cui, L., *et al.* Modulation of synaptic transmission from primary afferents to spinal substantia gelatinosa neurons by group III mGluRs in GAD65-EGFP transgenic mice. *J Neurophysiol* **105**, 1102-1111 (2011).
62. Doyle, M.W. & Andresen, M.C. Reliability of monosynaptic sensory transmission in brain stem neurons in vitro. *J Neurophysiol* **85**, 2213-2223 (2001).
63. Wang, H. & Zylka, M.J. Mrgprd-expressing polymodal nociceptive neurons innervate most known classes of substantia gelatinosa neurons. *J Neurosci* **29**, 13202-13209 (2009).

## Figure Legends:

**Figure 1.** *MrgprD*<sup>CreERT2</sup> mice can mediate recombination specifically in adult *MrgprD*<sup>+</sup> non-peptidergic nociceptors. (A) Knock-in *MrgprD*<sup>CreERT2</sup> allele. (B) Illustration showing tamoxifen treatment scheme, 0.5 mg tamoxifen / day, P10-P17 treatment of *MrgprD*<sup>CreERT2</sup>; *Rosa*<sup>ChR2-EYFP</sup> mice. (C) Triple staining of DRG section showing EYFP overlaps with IB4 but not CGRP. (D-F) Double fluorescent *in situ* DRG sections showing EYFP in *MrgprD* (D) but not *MrgprA3* (E) or *MrgprB4* (F) cells. Pie charts show overlap quantification (% of EYFP<sup>+</sup> cells that co-express Mrgpr, *n* = 3 animals). (G) DH section showing EYFP<sup>+</sup> terminal overlap with IB4 but not CGRP. Arrowheads show overlapping cells, arrows show non-overlapping cells. Scale bars = 50µm (C-F), 100µm (G).

**Figure 2.** Sparse *MrgprD*<sup>+</sup> nociceptor labeling in untreated 3-4 pw *MrgprD*<sup>CreERT2</sup>; *Rosa*<sup>iAP</sup> mice. (A&B) Whole mount AP DRG staining of thoracic (A) and L5 (B) DRGs. (C) AP<sup>+</sup> cells / DRG for cervical (C), thoracic (T), and lumbar (L) DRGs, *n* = 47 DRGs from 3 animals. (D-H) Whole mount DRG immunostaining plus AP fluorescent staining. Sparse AP<sup>+</sup> cells express non-peptidergic nociceptor markers peripherin (D), RET (F) and PAP (H) but not large diameter neuron marker NF200 (E) or peptidergic marker CGRP (G). (I) Whole mount EGFPf immunostaining plus AP fluorescence staining of untreated *MrgprD*<sup>CreERT2/EGFPf</sup>; *Rosa*<sup>iAP</sup> DRGs. AP<sup>+</sup> neurons are *MrgprD*<sup>+</sup> nociceptors. Quantification of overlap (% of AP<sup>+</sup> cells that co-express *MrgprD*<sup>EGFPf</sup>, *n* = 126 neurons from 3 animals). Scale bars = 50µm.

842

843 **Figure 3.** Peripheral organization of non-peptidergic nociceptors in 3-4 pw

844 *MrgprD<sup>CreERT2</sup>; Rosa<sup>iAP</sup>* mice. (A, B, D, E) Sparse labeled non-peptidergic nociceptors

845 show bushy-ending structure in the glabrous skin (A-B) and trunk hairy skin (D-E). B,

846 E, high magnification images of regions boxed in A and D, respectively. (C, F)

847 High-density labeled (0.5mg tamoxifen at P11) glabrous and hairy skin. Overall

848 neurite densities are lower in glabrous compared to hairy skin. Red arrowheads in

849 E&F mark neurite clumps that likely surround hair follicles. (G) Arbor areas in

850 different skin regions.  $n = 173$  terminals from 9 animals.  $* = p < 0.05$  (one-way

851 ANOVA with Tukey's multiple comparisons test). (H) Arbor areas in the hind limb

852 skin vs. proximodistal distance ( $D_{elbow}$ ) from the elbow (point 0, terminals distal to

853 this edge are given negative  $D_{elbow}$  values).  $n = 52$  arbors from 4 animals. No clear

854 relationship between proximodistal location and size is evident. Scale bars = 100 $\mu$ m.

855

856 **Figure 4.** Sparsely labeled *MrgprD<sup>CreERT2</sup>; Rosa<sup>iAP</sup>* nociceptors have region-specific

857 central arbor morphologies. (A-F) Round and long non-peptidergic central arbors seen

858 in top-down whole mount (A, C, D, F) and transverse section (B&E) spinal cords.

859 Round arbors are in the medial lumbar enlargement (B&C) while long arbors are in

860 the lateral lumbar enlargement and thoracic spinal cord (B-F). Dorsal roots are

861 outlined and labeled in C. Red dashed lines outline the round arbor zone. Orange

862 arrowhead marks a round terminal, purple arrowheads mark long terminals. M, medial.

863 L, lateral. R, rostral. C, caudal. (G) Round and long (defined by ratio in H) arbor areas



are comparable for all regions. (H) Arbor Width/Height ratios by ganglion of origin.

Round terminals:  $W/H > 0.2$ .  $n = 368$  terminals from 7 animals (I) Comparison of the

number of labeled arbors in the hindlimb digit and plantar paw skin with the number

of ipsilateral round terminals in the dorsal horn.  $n = 4$  animals, dotted line shows 1:1

relationship. (J) Illustration showing the distribution of round (orange zone) and long

(purple zone) arbors in the spinal cord. Scale bars = 50 $\mu$ m (A&B, D&E), 250 $\mu$ m

(C&F).

**Figure 5.** Non-peptidergic nociceptor labeling with increasing densities reveals

somatotopic organization of  $MrgprD^+$  central arbors. (A-F) AP staining of

$MrgprD^{CreERT2}; Rosa^{iAP}$  thoracic (A-C) and lumbar (D-F) spinal cords that received

prenatal 0mg (A&D), 0.25mg (B&E) or 0.5mg (C&F) prenatal tamoxifen. Even with

increased labeling densities, round and long arbors occupy exclusive zones of the DH.

$n = 3$  animals per treatment. Scale bars = 250 $\mu$ m.

**Figure 6.** Plantar paw circuits show a heightened signal transmission in the dorsal

horn. (A) Illustration of spinal cord slice recording from  $MrgprD^{CreERT2}; Rosa^{ChR2-EYFP}$

mice (P14-P21 tamoxifen) using optical stimulation. Neuron cell bodies located in the

territory innervated by  $EYFP^+$  fibers were chosen for recording. (B&C) Monosynaptic

(B) and polysynaptic (C) light-induced EPSC (EPSC<sub>L</sub>) traces recorded from layer II

neurons during 0.2 Hz light stimulation (overlay of 20 traces). Light pulses indicated

885 by blue arrows, scale bars shown in lower right. (D) In *MrgprD*<sup>CreERT2/+</sup>;  
886 *Rosa*<sup>ChR2-EYFP/ChR2-EYFP</sup> homozygous slices, similar incidences of light-responsive  
887 neurons were found in medial and lateral lumbar regions. (E) In *MrgprD*<sup>CreERT2/+</sup>;  
888 *Rosa*<sup>ChR2-EYFP/+</sup> heterozygous slices, a much higher incidence of light-responsive  
889 neurons was seen in medial lumbar compared to lateral lumbar or medial thoracic  
890 circuits. (F) Frequency distribution of threshold light pulse durations required for  
891 eliciting EPSC<sub>LS</sub> among cells in E. Among responsive cells, postsynaptic neurons in  
892 lateral lumbar and thoracic regions require longer pulse durations to be activated  
893 compared to those in medial lumbar region. Cell (*n*) numbers indicated in parentheses  
894 above bars in D-F.

895  
896 **Figure 7.** Peripheral optogenetic activation of *MrgprD*<sup>+</sup> nociceptors reveals regional  
897 differences in optical threshold required to elicit withdrawal responses. (A-C) Optical  
898 stimulation in the paw. (A) Representative whole-mount immunostaining of plantar  
899 paw skin in *MrgprD*<sup>CreERT2/+</sup>; *Rosa*<sup>ChR2-EYFP/ChR2-EYFP</sup> mice, *n*=3 mice. (B) Schematic  
900 of light placement on paw skin, see videos. (C) Histogram showing percentage of  
901 mice displaying aversive responses to 5mW green light and 1 or 5mW blue light to  
902 littermate control (*C*) and *MrgprD*<sup>CreERT2/+</sup>; *Rosa*<sup>ChR2-EYFP/ChR2-EYFP</sup> (*M*). *n* = 6-10 for  
903 each genotype with 1-2 trials per mouse. \* = *p* <0.001 Chi-square test. (D-F) Optical  
904 stimulation in the leg. (D) Representative whole-mount immunostaining of upper leg  
905 skin in *MrgprD*<sup>CreERT2/+</sup>; *Rosa*<sup>ChR2-EYFP/ChR2-EYFP</sup> mice, *n* = 3 mice. Dotted lines outline



906 skin in *MrgprD*<sup>CreERT2/+</sup>; *Rosa*<sup>ChR2-EYFP/ChR2-EYFP</sup> mice, *n* = 3 mice. Dotted lines outline  
 907 hair follicles (E) Schematic of light placement on hair-shaven leg skin, see videos. (F)  
 908 Histogram showing percentage of mice displaying aversive responses to 5, 10, or  
 909 20mW blue light at the leg (see above panel C for genotype description and statistical  
 910 analyses). (G) A lower activation threshold is required for paw versus leg skin  
 911 nociceptors. (H) Temporal delay time (seconds) from light onset to the first aversive  
 912 behavior with 5, 10, or 20mW blue light in paw or leg of *MrgprD*<sup>CreERT2/+</sup> ;  
 913 *Rosa*<sup>ChR2-EYFP/ChR2-EYFP</sup> mice. Error bars represent SEM. (I) Model showing  
 914 somatotopic organization of mammalian nociceptive circuitry. Distinct central arbor  
 915 morphologies (“round versus long”) of *MrgprD*<sup>+</sup> non-peptidergic nociceptors are  
 916 observed in the medial versus lateral dorsal spinal cord, which correlates well with  
 917 regional peripheral sensitivity and cortical representation. Scale bars = 50μm.

918

# 919 **Supplemental Figures and Videos:**

920 **Supplementary Figure S1.** Generation of *MrgprD*<sup>CreERT2</sup> knock-in mouse line. (A)  
 921 Illustration showing the knock-in targeting strategy. Grey bar, 3’ UTR Southern blot  
 922 probe site. P1, P2, primers for PCR screening. (B) Southern blot of SpeI-digested ES  
 923 genomic DNA, using a probe against *MrgprD* 3’ UTR (grey bar in A). 4.3 kb,  
 924 *MrgprD*<sup>CreERT2</sup> knock-in allele. 3.8 kb, *MrgprD* wild-type allele. (C) PCR screen of  
 925 electroporated ES clones, using P1, P2 primers. The positive PCR product is about 2  
 926 kb.

927

928 **Supplementary Figure S2.** Prenatal tamoxifen treatment labels MrgprD<sup>+</sup> along with

929 MrgprA3/B4<sup>+</sup> non-peptidergic DRG neurons. (A-D) Representative DRG sections of

930 3pw *MrgprD*<sup>CreERT2</sup>; *Rosa*<sup>tdTomato</sup> mice (2.5-5 mg tamoxifen at E16.5) immunostained

931 with the indicated markers. tdT<sup>+</sup> neurons are positive for non-peptidergic neuron

932 markers peripherin (92.5 ± 4.0%) (A) and IB4 (85.6 ± 1.2%) (C), but do not express

933 NF200 (1.2 ± 0.01%) (B) or CGRP (1.4 ± 0.00%) (D). (E) Representative

934 immunostained DH section showing tdT<sup>+</sup> fibers innervating layer II, ventral to

935 CGRP<sup>+</sup> fibers but dorsal to PKCγ interneurons. (F-H) Double fluorescent *in situ*

936 shows expression of *MrgprD* (75.2 ± 0.8%) (F), *MrgprA3* (15.0 ± 0.2%) (G) and

937 *MrgprB4* (8.6 ± 0.1%) (H) in tdT expressing neurons from prenatally treated

938 *MrgprD*<sup>CreERT2</sup>; *Rosa*<sup>tdTomato</sup> mice (5 mg tamoxifen at E17.5). (I) Model showing

939 *MrgprD*<sup>CreERT2</sup> specificity based on time of tamoxifen dosage. *MrgprD*<sup>CreERT2</sup>

940 recombination is consistent with expression of *MrgprD* across development.

941 Arrowheads indicate marker overlap with tdT, arrows indicate tdT<sup>+</sup> cells that do not

942 express indicated marker. Scale bars, 50μm (A-D, F-H), 100μm (E).

943

944 **Supplementary Figure S3.** Rare free arbors are found in sparsely labeled

945 non-peptidergic nociceptors of *MrgprD*<sup>CreERT2</sup>; *Rosa*<sup>iAP</sup> mice. (A) Percentage of bushy

946 or free ending type arbors by location. *n* = 132 hairy, 22 glabrous terminals from 4

animals. (B&C) Sparse labeled free terminal-type arbor in trunk hairy skin. C is a high magnification view of the region boxed in B. Scale bars = 100μm.

**Supplementary Figure S4.** Central arbors of sparsely labeled non-peptidergic neurons in *MrgprD<sup>CreERT2</sup>; Rosa<sup>iAP</sup>* mice. (A&B) Examples of bifurcating non-peptidergic nociceptor central projections from 1pw (0.05 mg tamoxifen at E16.5) (A) and 3pw (B) spinal cords. Bifurcated branches sometimes give rise to independent terminals (arrows in A), join other branches to give rise to a common terminal (arrows in B) or end without elaborating a terminal (arrowhead in B). (C) Round terminals in the upper cervical spinal cord and medulla, many of which descend from the TG non-peptidergic neurons. Scale bars, 50μm (A&B), 250μm (C).

**Supplemental Figure S5.** Neighboring non-peptidergic nociceptors overlap extensively in the skin and spinal cord. (A-C) Whole mount immunostaining of *MrgprD<sup>CreERT2/EGFPf</sup>; Rosa<sup>tdTomato</sup>* (0.5 mg tamoxifen at E16.5) hairy skin with anti-GFP and anti-RFP antibodies. The terminal field of one non-peptidergic nociceptor is labeled with tdT, as outlined in A. B&C show higher magnifications view of the regions boxed in A (solid line = B, dotted line = C). Innervation of hair follicles is shown in C. (D) Immunostaining of a section of glabrous skin. (E&F) Immunostaining of medial cervical (D) and thoracic (E) spinal cord sections, showing

sparse labeled round terminal and long terminals. Scale bars = 100µm (A), 20µm

(B-F).

**Supplementary Figure S6.** MrgprD<sup>+</sup> neurons show no regional difference in

*Rosa*<sup>ChR2-EYFP</sup> expression. (A&B). Native (no immunostaining) ChR2-EYFP

fluorescence of *MrgprD*<sup>CreERT2</sup>; *Rosa*<sup>ChR2-EYFP</sup> (P10-P17 tamoxifen) DRG sections. (C)

T10-T12 and L4-L4 DRG cell body fluorescence frequency distributions overlap,

indicating no regional change in ChR2-EYFP expression level. Scale bars = 100µm.

**Supplementary Figure S7.** *In vivo* optogenetic peripheral stimulation. (A-C)

*MrgprD*<sup>CreERT2</sup>; *Rosa*<sup>ChR2-EYFP</sup> sectioned upper leg hairy skin (B) shows a higher

density of ChR2-EYFP<sup>+</sup> neurites than plantar paw glabrous skin (A). (C)

Quantification of neurites per 100µm. *n* = 3 animals. \* = *p* < 0.05, Chi-square test. (D)

Measured light power at three locations (closest side, midpoint, farthest side) in the

behavior chamber with 5 mW, 10 mW, and 20 mW blue laser intensity. (E) Response

rate (% of mice) showing withdrawal responses to 5 mW blue light stimulation at paw

or upper leg. *n* = 6-10 mice, 1-2 trials per mouse. Scale bars = 50 µm (A&B).

**Supplementary Video 1.** High speed video recording of green laser light (5 mW)

plantar paw stimulation of Control (*ChR2*) mice. Green light does not induce an

avoidance response.

988

989 **Supplementary Video 2.** High speed video recording of green laser light (5 mW)

990 plantar paw stimulation of *MrgprD*; *ChR2* mice. Green light does not induce an

991 avoidance response.

992

993 **Supplementary Video 3.** High speed video recording of blue laser light (5 mW)

994 plantar paw stimulation of Control mice. Blue light does not induce an avoidance

995 response in Control mice.

996

997 **Supplementary Video 4.** High speed video recording of blue laser light (5 mW)

998 plantar paw stimulation of *MrgprD*; *ChR2* mice. 5 mW blue laser light triggers robust

999 avoidance responses, including paw withdrawal and shaking, when applied to the paw

1000 of *MrgprD*; *ChR2* mice.

1001

1002 **Supplementary Video 5.** High speed video recording of blue laser light (5 mW)

1003 shaved upper leg stimulation of Control mice. No avoidance response is seen.

1004

1005 **Supplementary Video 6.** High speed video recording of blue laser light (5 mW)

1006 upper leg stimulation of *MrgprD*; *ChR2* mice. 5 mW blue laser light is insufficient to

1007 trigger avoidance responses when applied to the shaved upper leg of *MrgprD*; *ChR2*

1008 mice.

1009

1010 **Supplementary Video 7.** High speed video recording of blue laser light (20mW)

1011 upper leg stimulation of Control mice. No avoidance response is seen, indicating that

1012 20 mW laser light stimulation is not by itself aversive.

1013

1014 **Supplementary Video 8.** High speed video recording of blue laser light (20mW)

1015 upper leg stimulation of *MrgprD*; *ChR2* mice. 20 mW laser light induces robust

1016 avoidance behavior, including limb withdrawal and licking, when applied to the

1017 shaved upper leg of *MrgprD*; *ChR2* mice.

1018

# Figure 1

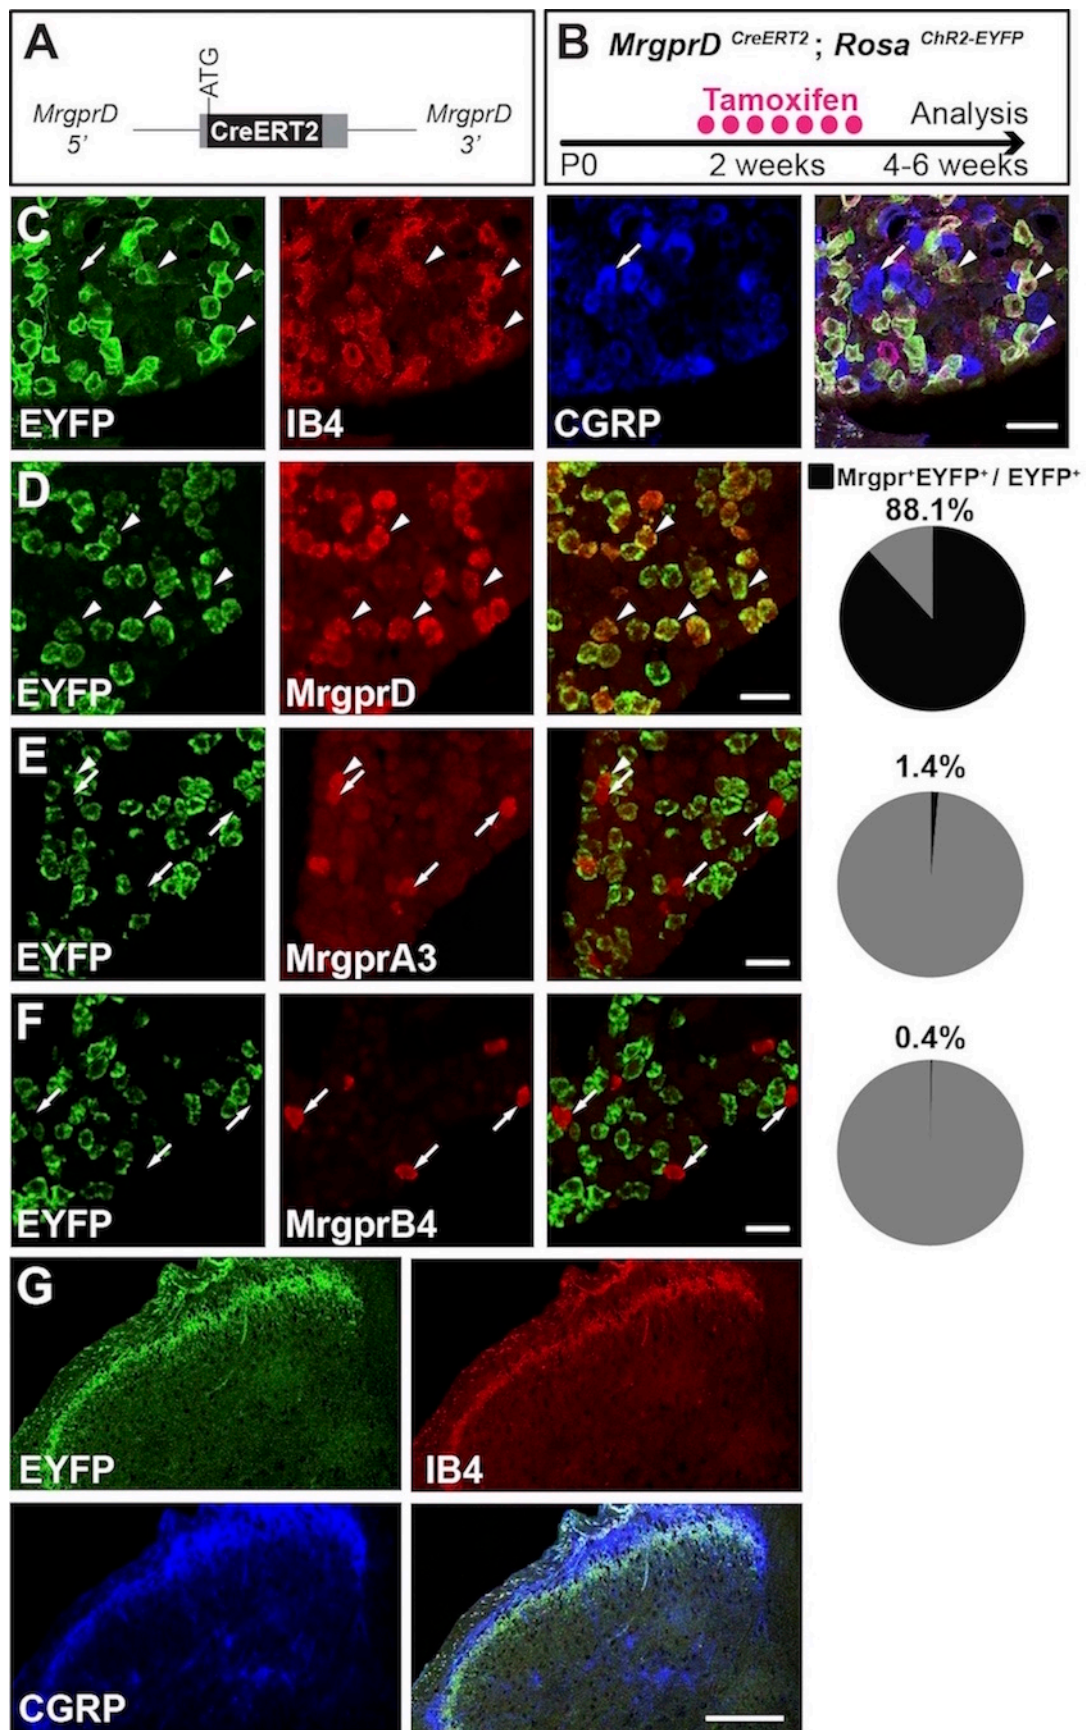



Figure 2

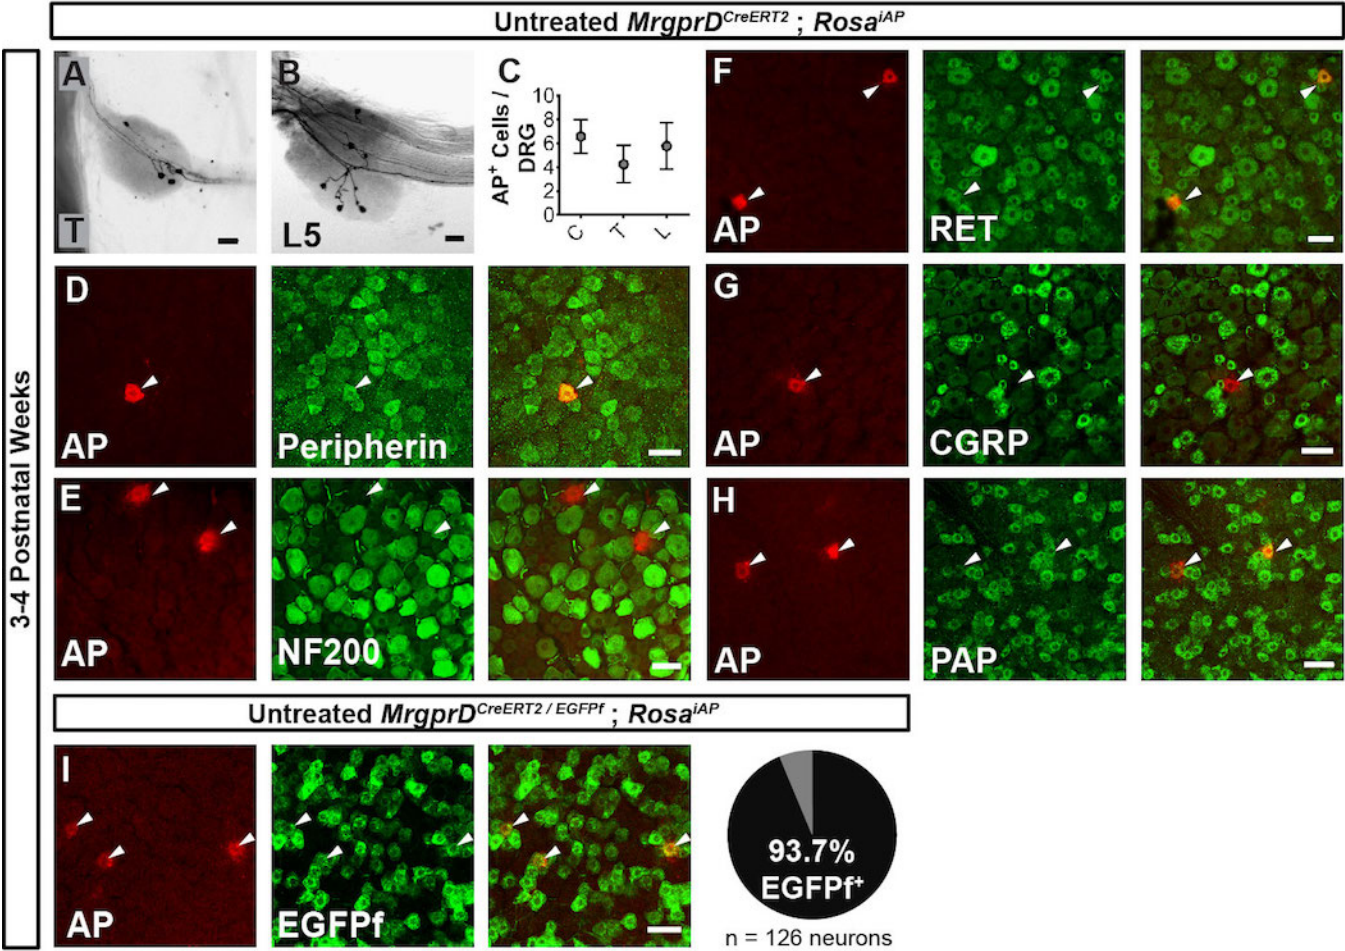



Figure 3

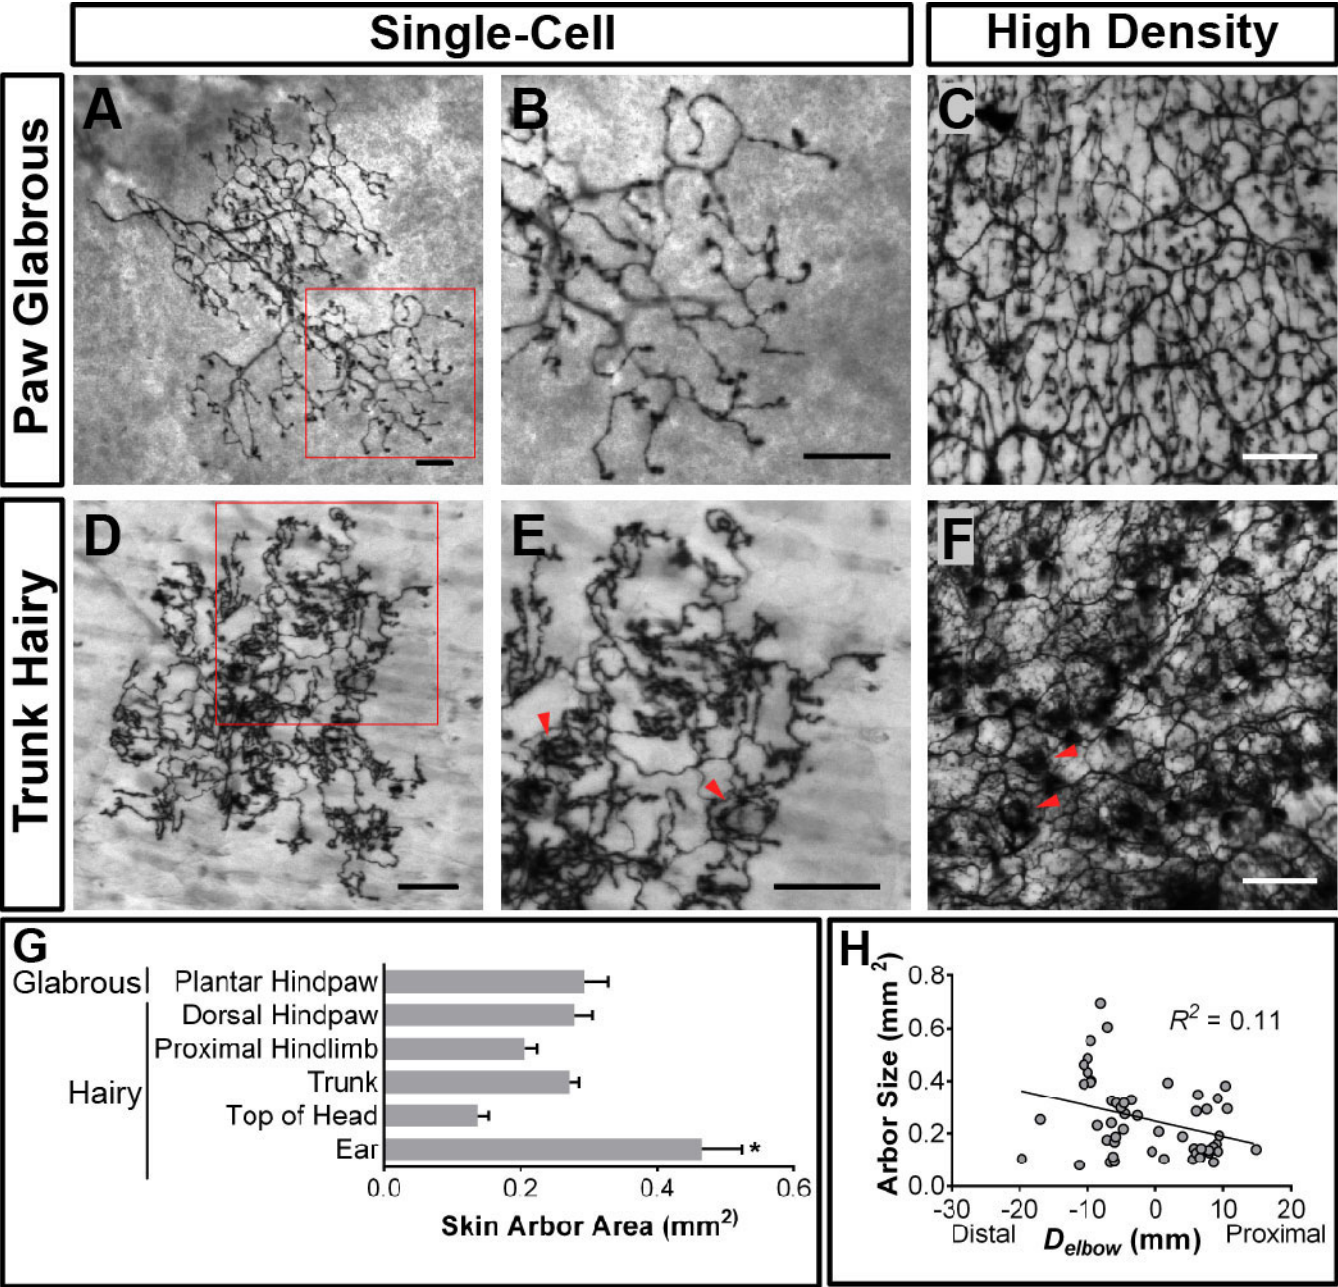

Figure 4

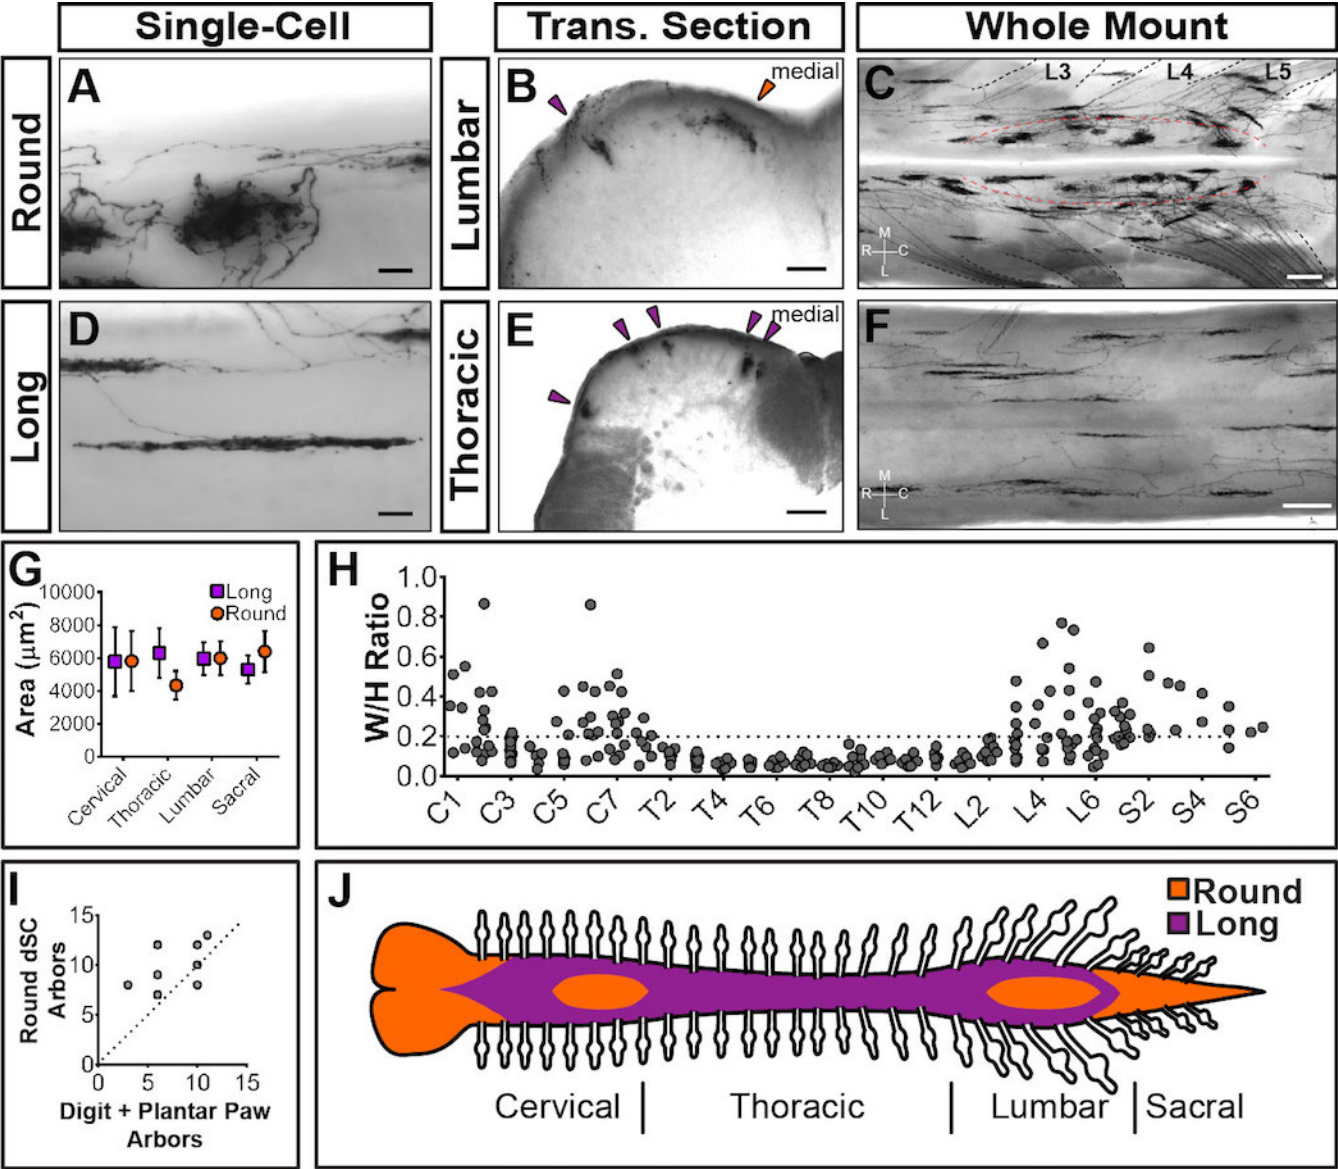

Figure 5

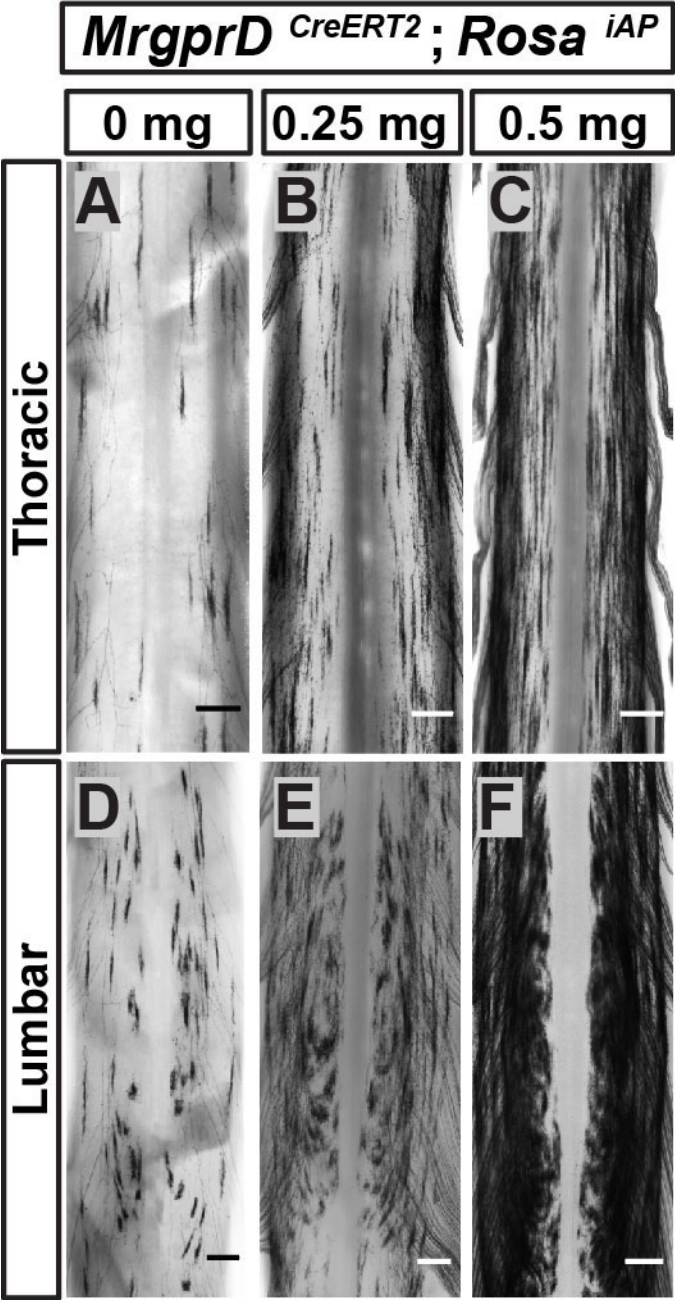

Figure 6

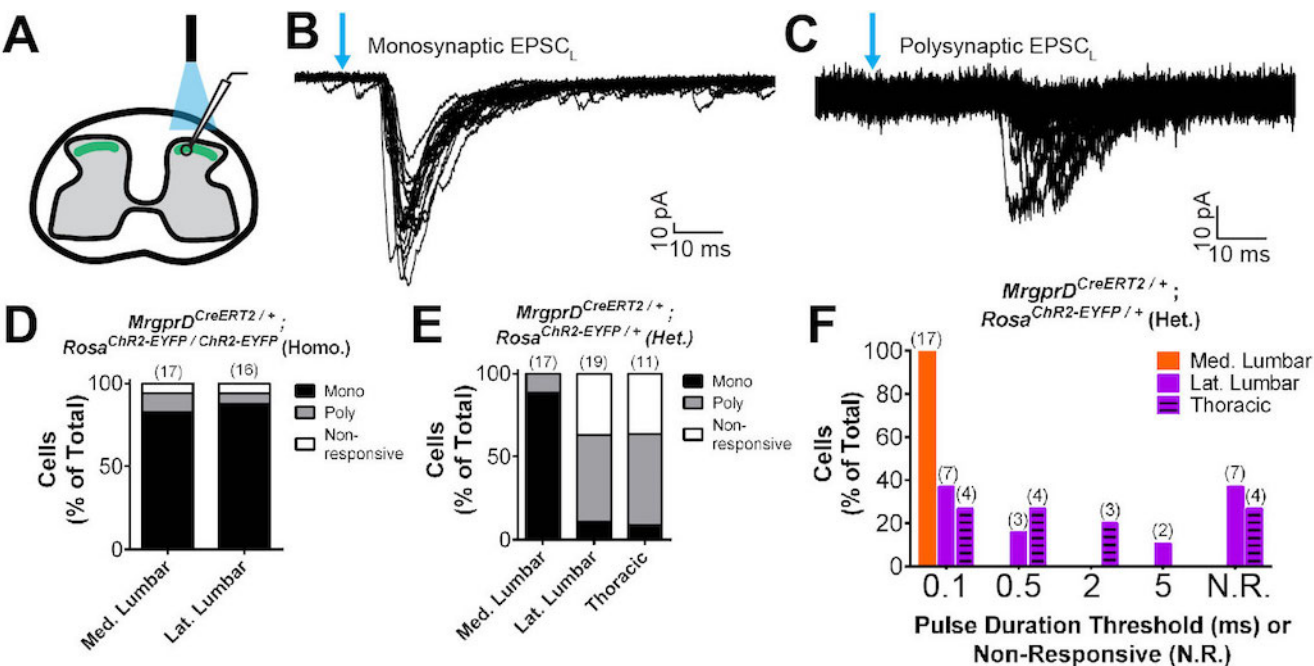



Figure 7

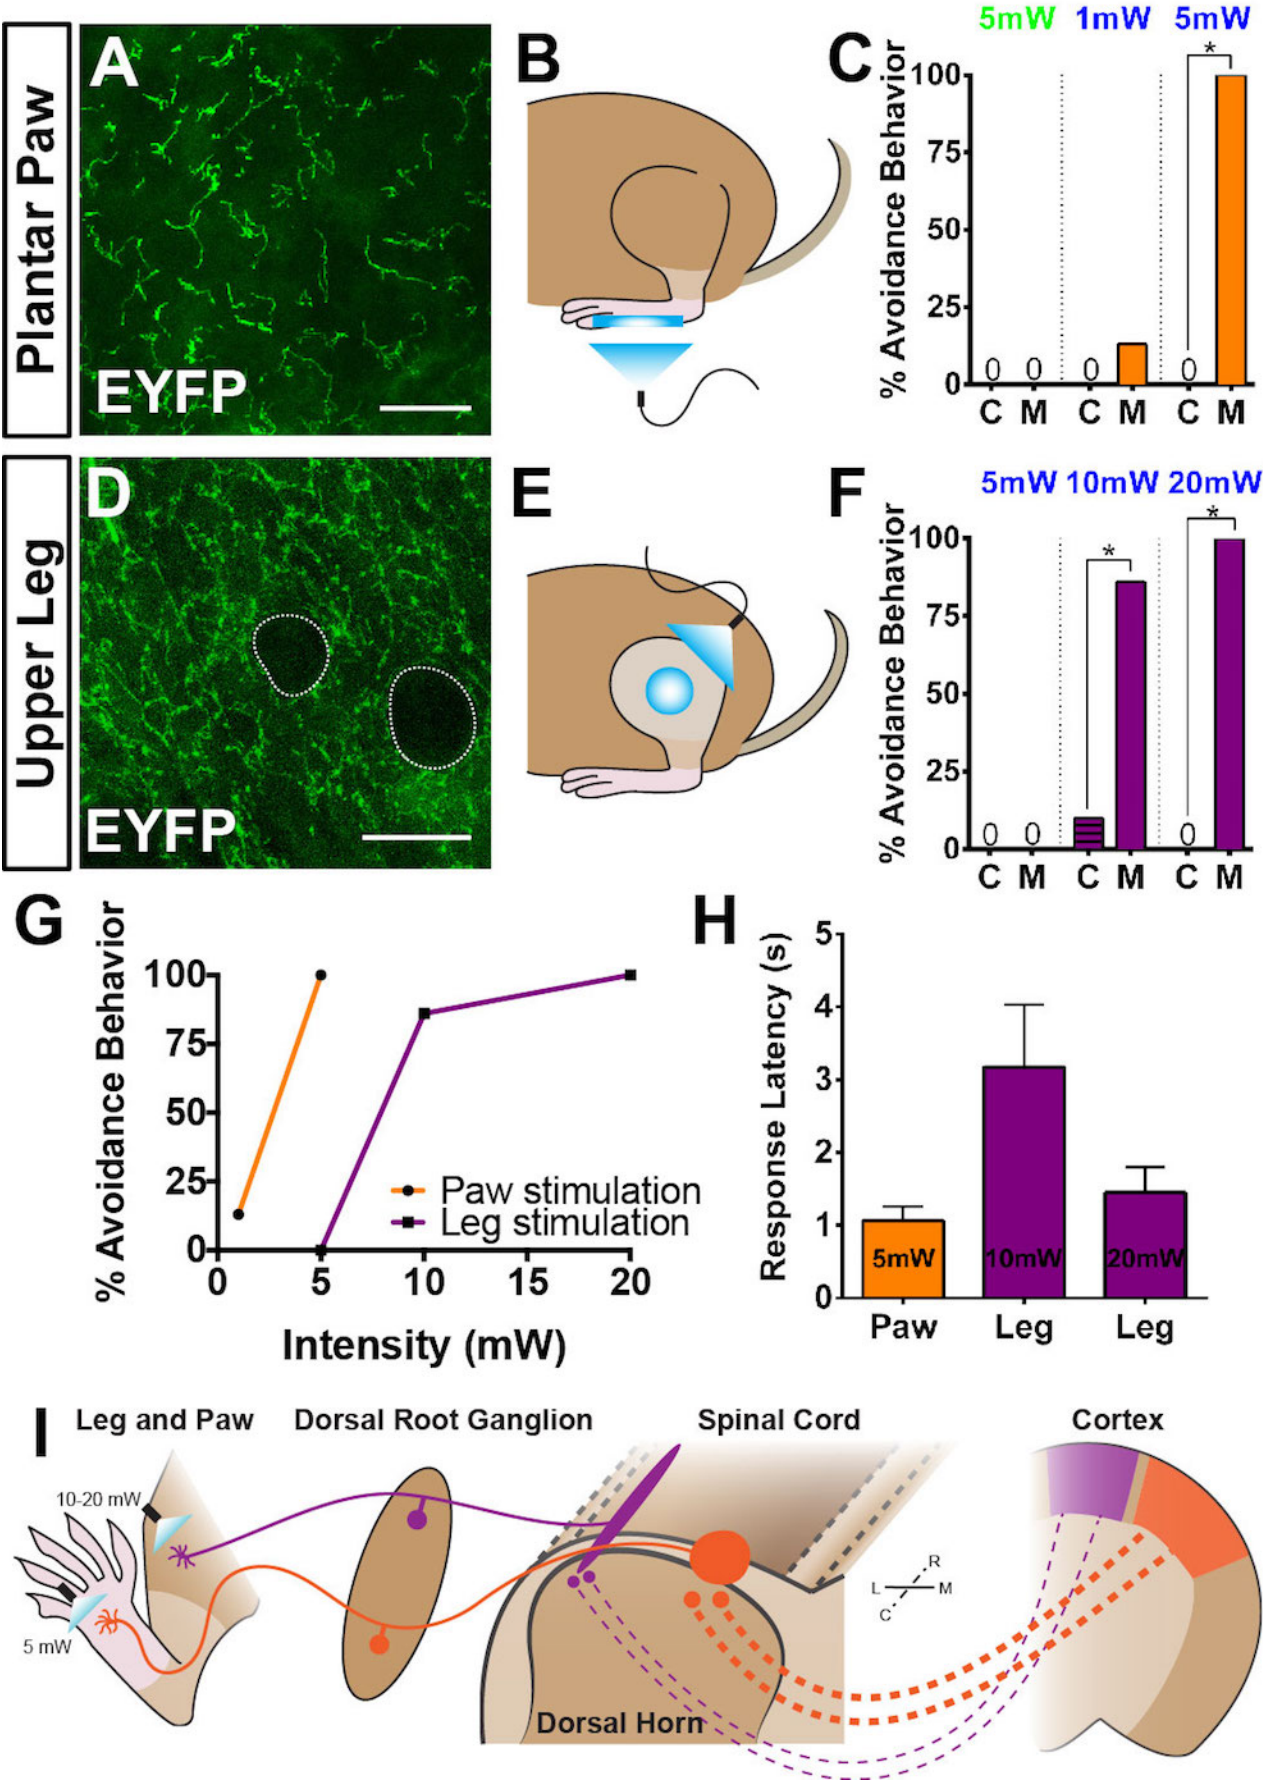

# Figure S1

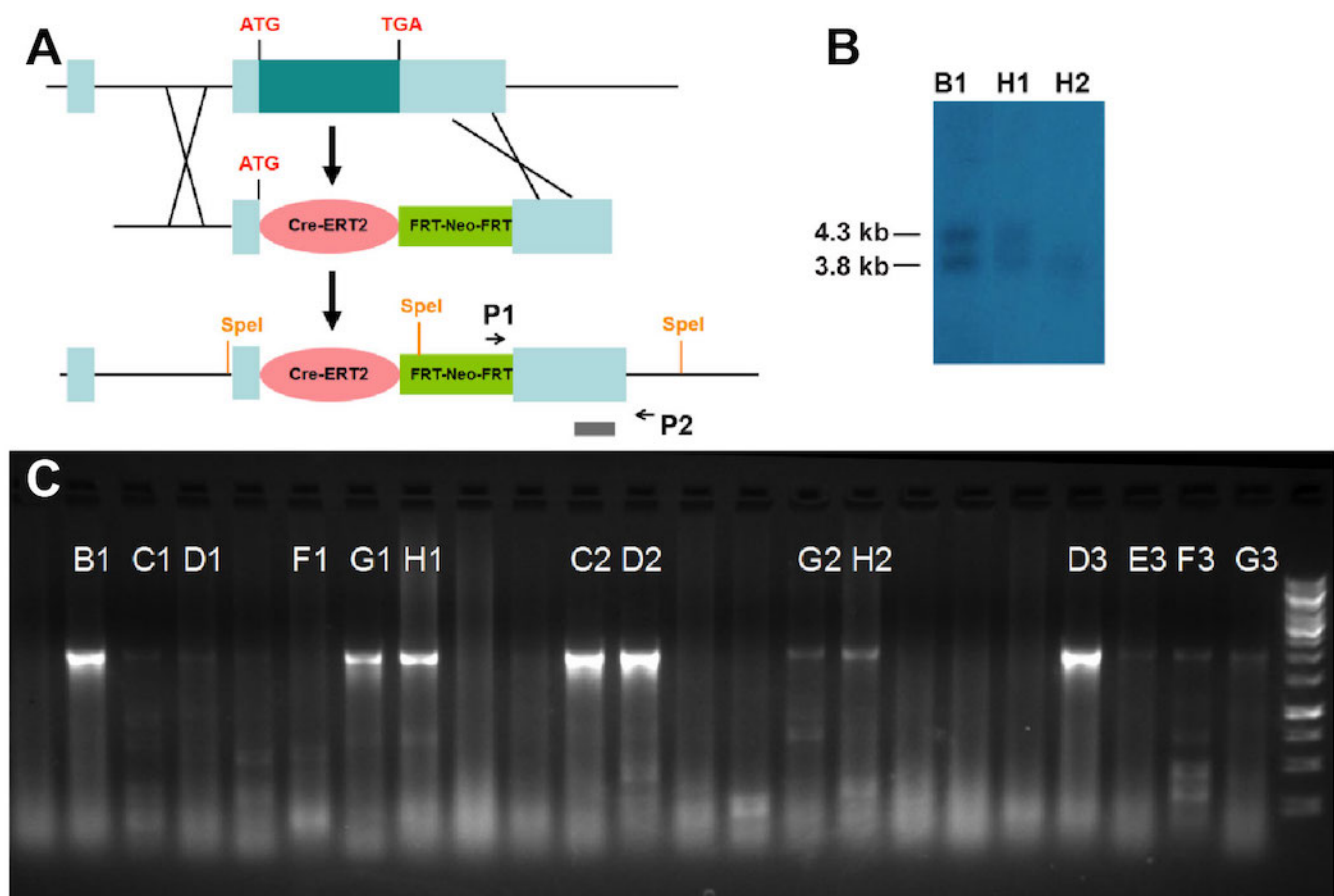

*MrgprD*<sup>CreERT2</sup>; *Rosa*<sup>tdT</sup>, E16.5 or E17.5 Tmx.

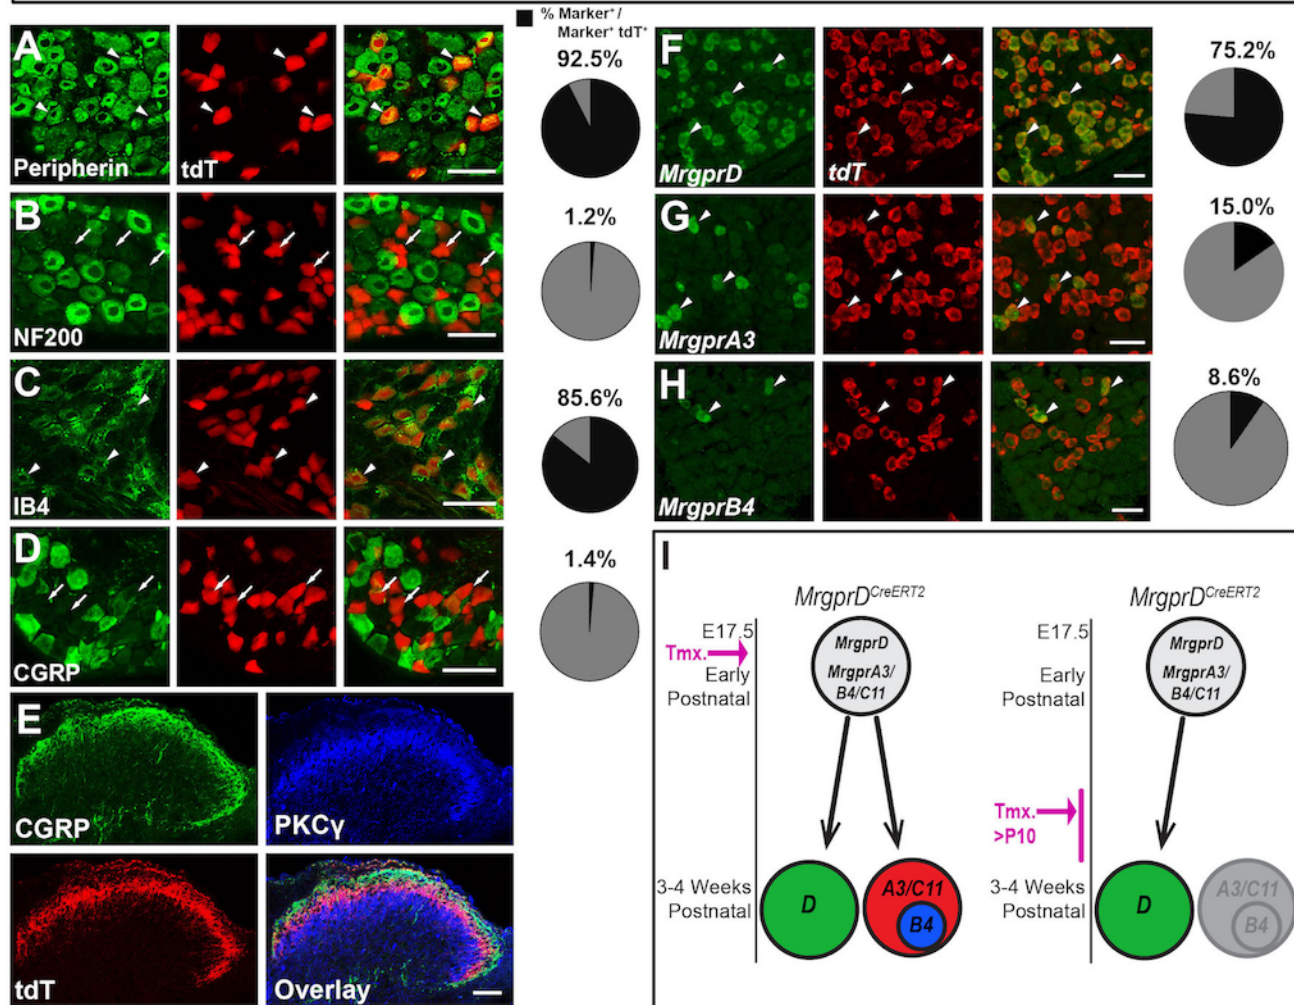

Figure S2

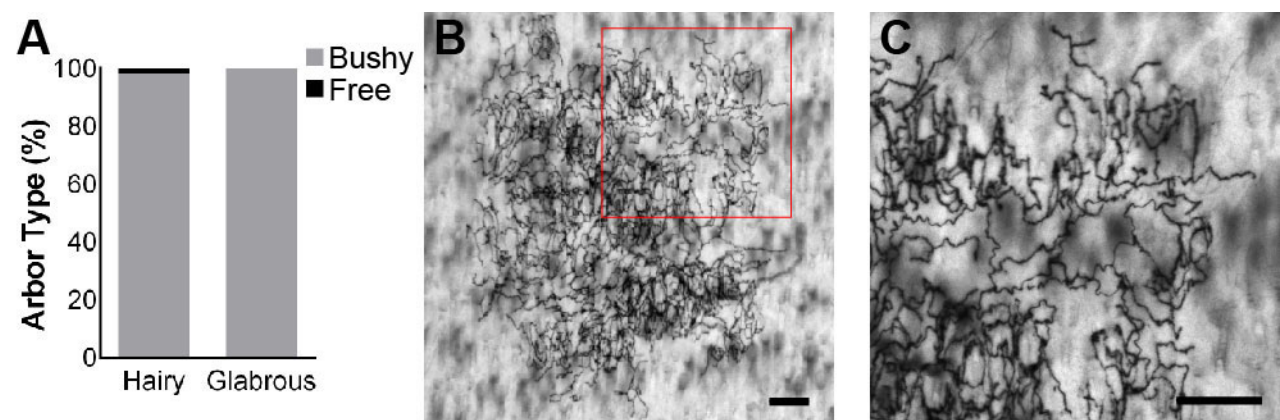



Figure S3

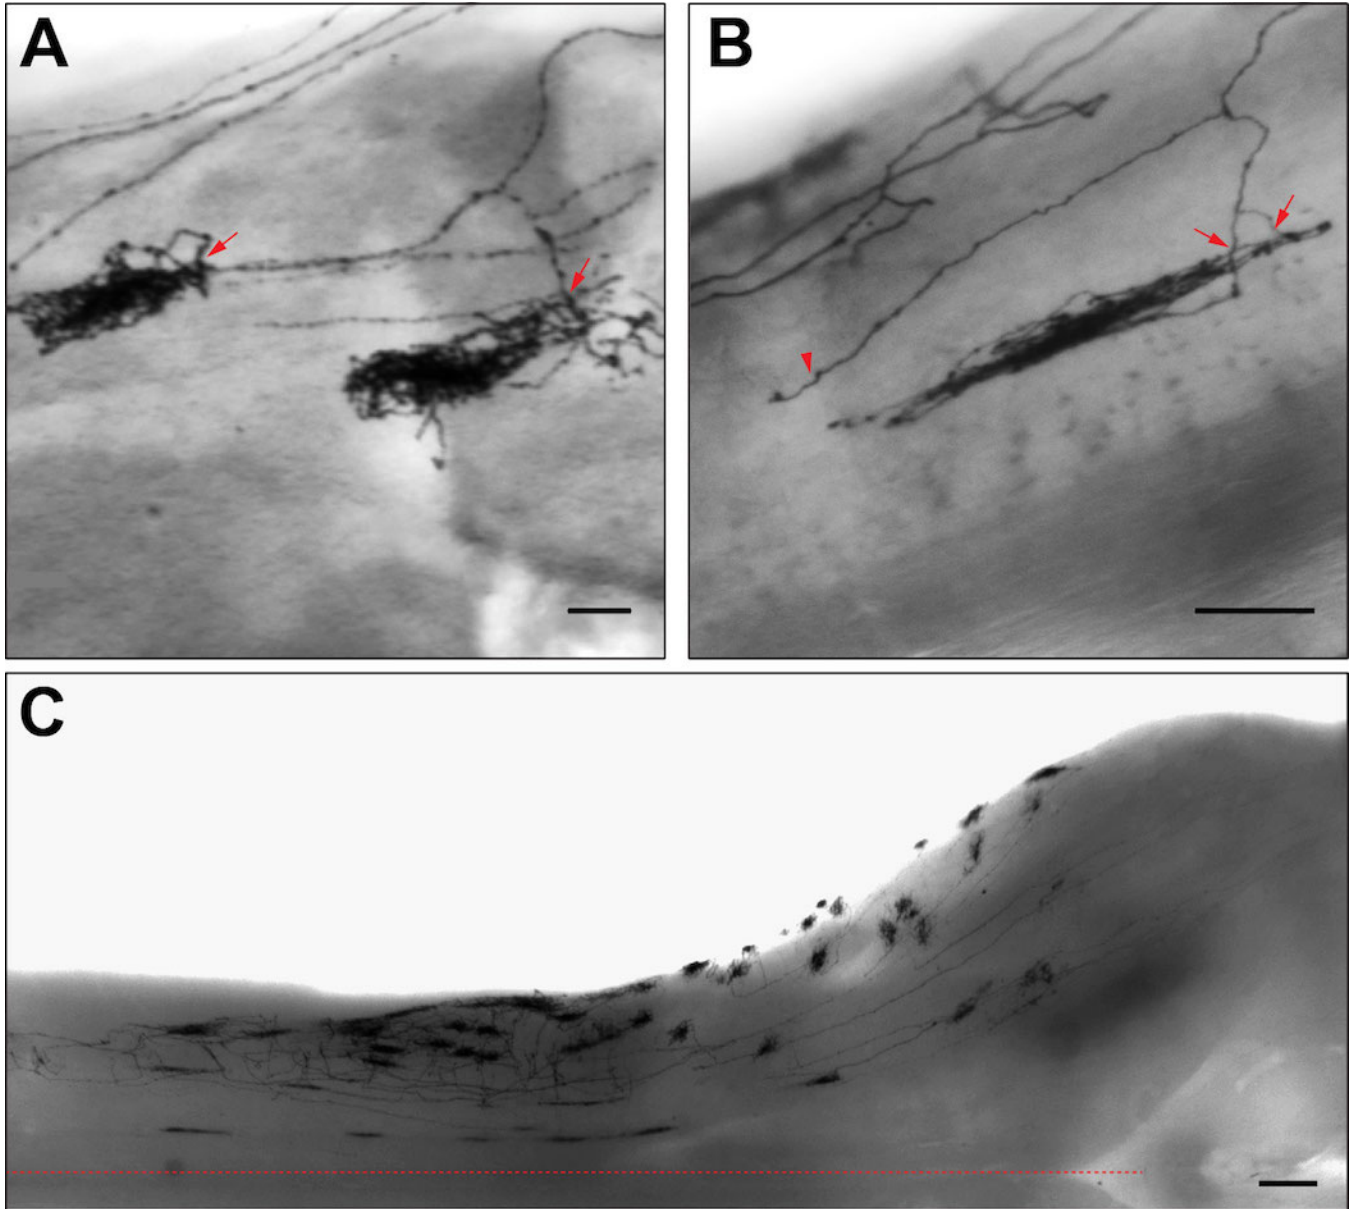

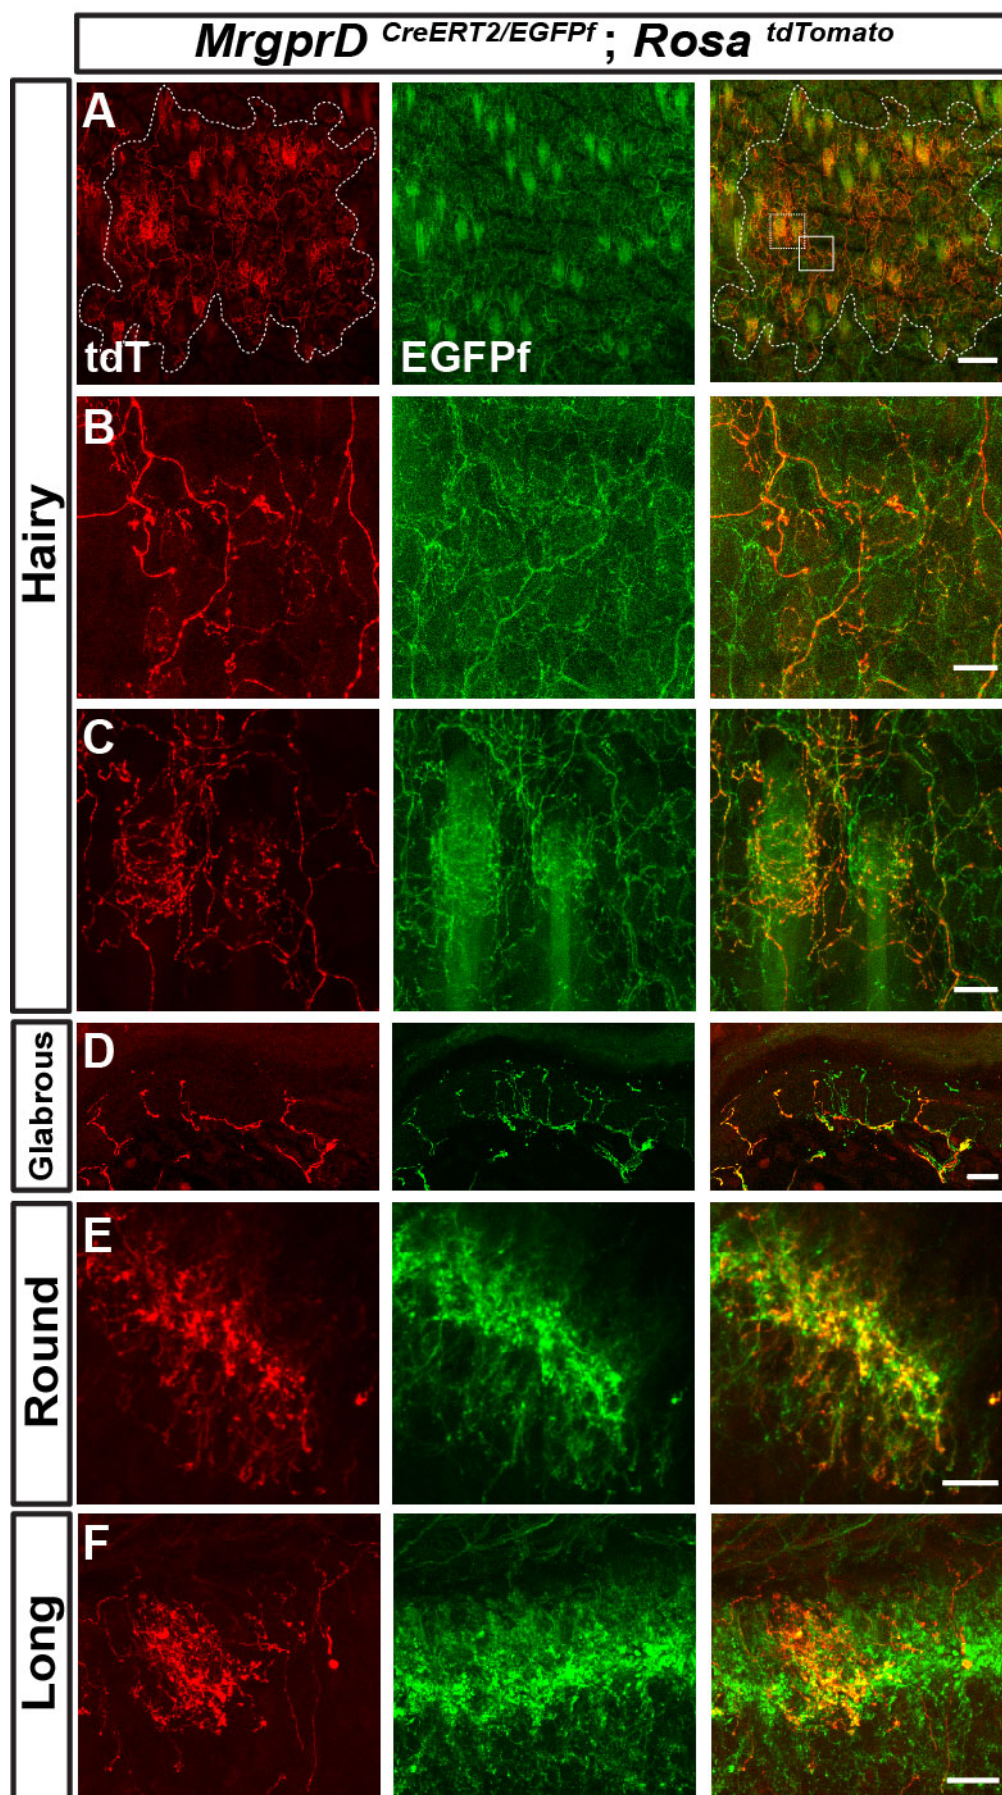

Figure S5

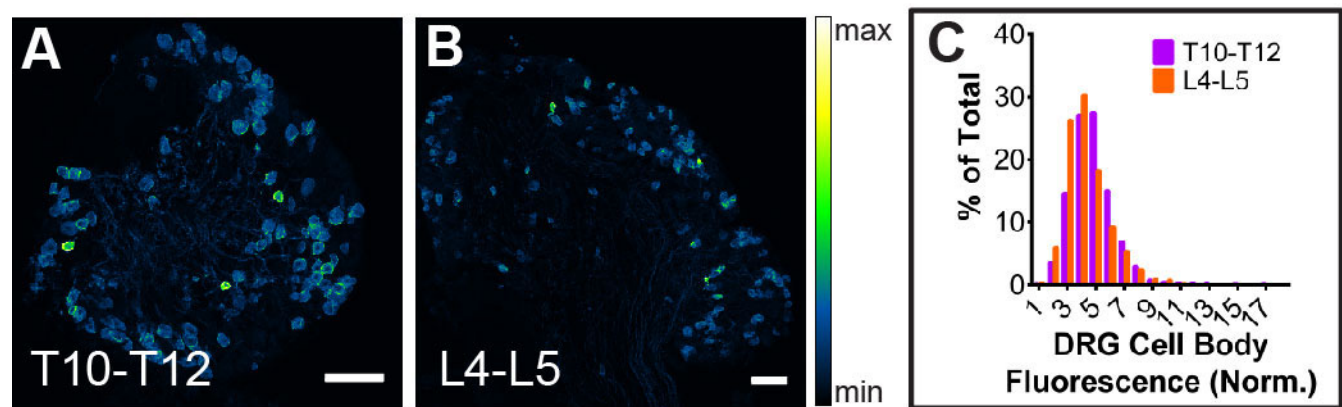



# Figure S6

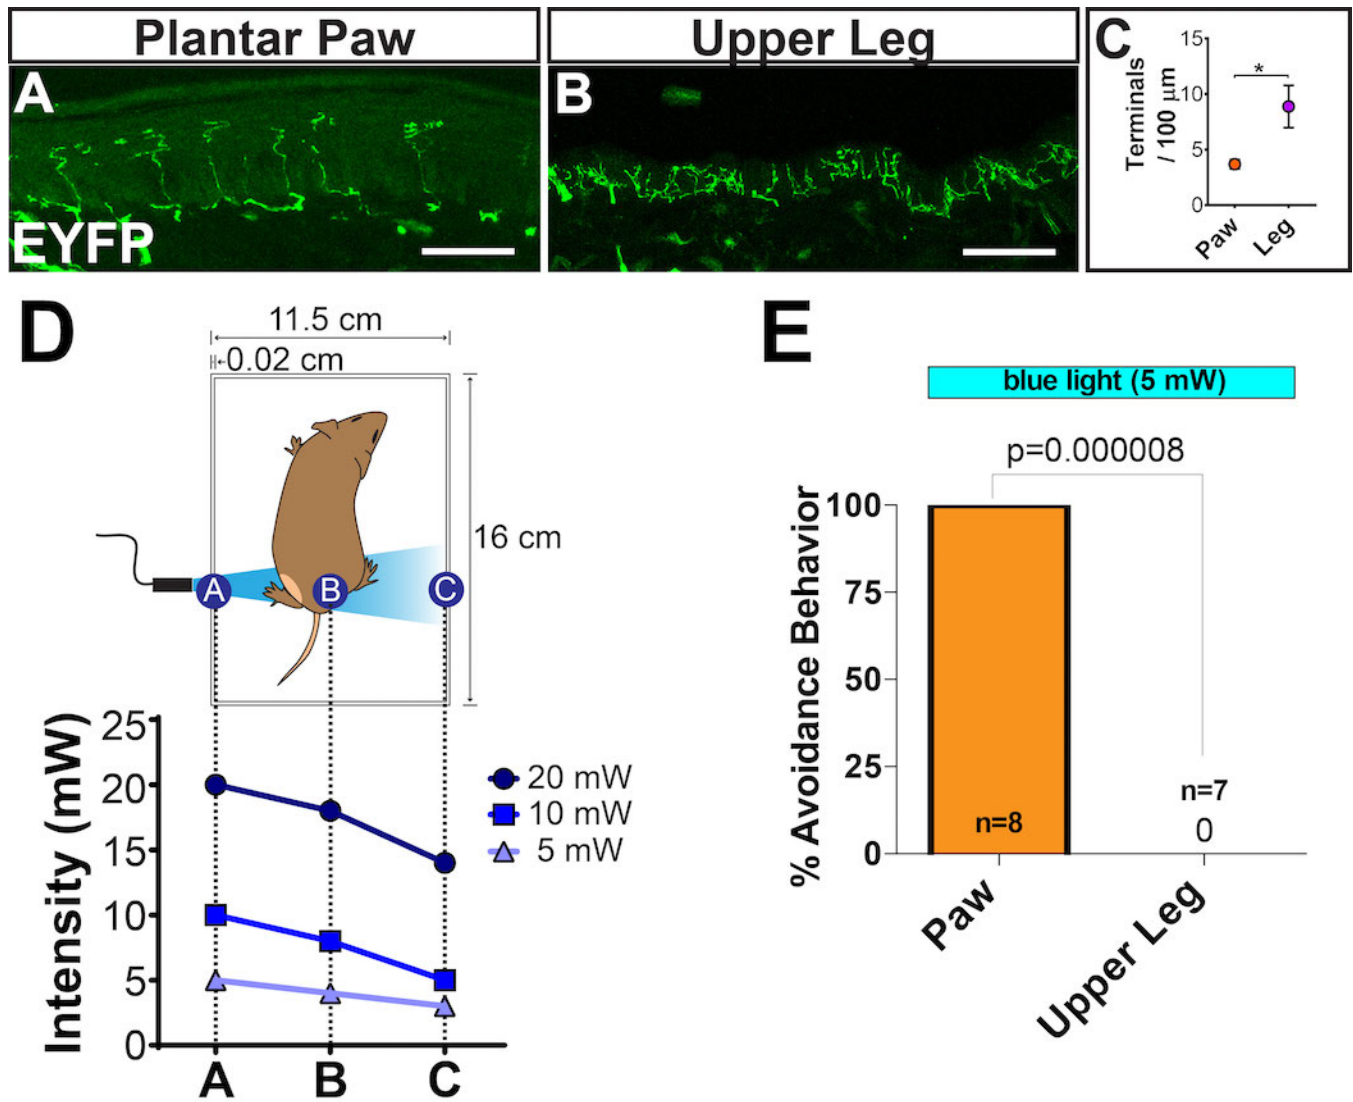

| <b>Region</b>                 | <b>n</b> | <b>Avg area<br/>(mm<sup>2</sup>)</b> | <b>SE</b> | <b>Min area<br/>(mm<sup>2</sup>)</b> | <b>Max area<br/>(mm<sup>2</sup>)</b> |
|-------------------------------|----------|--------------------------------------|-----------|--------------------------------------|--------------------------------------|
| Plantar hindpaw<br>(glabrous) | 22       | <b>0.29</b>                          | 0.03      | 0.08                                 | 0.86                                 |
| Dorsal hindpaw                | 27       | <b>0.28</b>                          | 0.03      | 0.15                                 | 0.54                                 |
| Proximal hindlimb             | 29       | <b>0.21</b>                          | 0.02      | 0.14                                 | 0.32                                 |
| Dorsal forepaw                | 9        | <b>0.26</b>                          | 0.07      | 0.11                                 | 0.45                                 |
| Proximal forelimb             | 3        | <b>0.14</b>                          | 0.01      | 0.13                                 | 0.14                                 |
| Trunk                         | 77       | <b>0.27</b>                          | 0.01      | 0.10                                 | 0.9                                  |
| Top of head                   | 6        | <b>0.14</b>                          | 0.02      | 0.10                                 | 0.20                                 |
| Ear*                          | 11       | <b>0.47</b>                          | 0.06      | 0.22                                 | 0.93                                 |

**Table 1. Summary of peripheral terminals of sparsely labeled MrgprD<sup>+</sup> non-peptidergic nociceptors.** Data pooled from seven 3pw animals. Asterisk (\*) indicates a significant difference ( $p < 0.05$ , One-way ANOVA with Tukey's multiple comparison test) in average size in pair-wise comparisons with all other regions.

|                                                       | <i>n</i> | % of Total |
|-------------------------------------------------------|----------|------------|
| Total neurons                                         | 234      |            |
|                                                       |          |            |
| Segments traveled from point of entry                 |          |            |
| 0                                                     | 170      | 72.6       |
| 1                                                     | 54       | 23.1       |
| 2                                                     | 9        | 3.8        |
| 3                                                     | 1        | 0.4        |
|                                                       |          |            |
| Direction traveled (for axons traveling 1-3 segments) |          |            |
| Caudal                                                | 46       | 19.7       |
| Rostral                                               | 18       | 7.7        |
|                                                       |          |            |
| No central branch bifurcations                        | 154      | 65.8       |
| 1 central branch bifurcation                          | 72       | 30.8       |
| >1 central branch bifurcation                         | 8        | 3.4        |
|                                                       |          |            |
| No central terminals                                  | 1        | 0.4        |
| 1 central terminals                                   | 215      | 91.9       |
| 2 central terminals                                   | 16       | 6.8        |
| 3 central terminals                                   | 2        | 0.9        |

**Table 2. Summary of central innervation patterns of sparsely labeled MrgprD<sup>+</sup>**

**non-peptidergic nociceptors.** Data pooled from three 3pw animals.

|          | Round |                             |    |                            |    | Long |                             |    |                            |    |
|----------|-------|-----------------------------|----|----------------------------|----|------|-----------------------------|----|----------------------------|----|
|          | n     | Height<br>( $\mu\text{m}$ ) | SE | Width<br>( $\mu\text{m}$ ) | SE | n    | Height<br>( $\mu\text{m}$ ) | SE | Width<br>( $\mu\text{m}$ ) | SE |
| Cervical | 31    | <b>145</b>                  | 28 | <b>49</b>                  | 11 | 45   | <b>259</b>                  | 56 | <b>28</b>                  | 5  |
| Thoracic | 3     | <b>155</b>                  | 6  | <b>37</b>                  | 6  | 81   | <b>334</b>                  | 61 | <b>24</b>                  | 4  |
| Lumbar   | 99    | <b>157</b>                  | 20 | <b>48</b>                  | 5  | 83   | <b>274</b>                  | 32 | <b>28</b>                  | 3  |
| Sacral   | 19    | <b>162</b>                  | 22 | <b>51</b>                  | 7  | 7    | <b>197</b>                  | 19 | <b>35</b>                  | 3  |

**Table 3. Summary of non-peptidergic nociceptor central terminal height and width measurements.** Round and long terminals were defined by W/H ratios (round = W/H ratio  $>0.2$ , long = W/H ratio  $<0.2$ ). Data pooled from seven 3pw animals.

*MrgprD*<sup>CreERT2</sup>; *Rosa*<sup>ChR2-EYFP/ChR2-EYFP</sup> (ChR2 Homozygous)

|                | <i>Transverse</i> |                        |                        |                |
|----------------|-------------------|------------------------|------------------------|----------------|
|                | <i>n</i>          | Mono EPSC <sub>L</sub> | Poly EPSC <sub>L</sub> | Non-Responsive |
| Medial Lumbar  | 15                | 11<br>(73.3%)          | 3<br>(20%)             | 1<br>(6.7%)    |
| Lateral Lumbar | 18                | 16<br>(88.9%)          | 1<br>(5.6%)            | 1<br>(5.6%)    |

*MrgprD*<sup>CreERT2</sup>; *Rosa*<sup>ChR2-EYFP/+</sup> (ChR2 Heterozygous)

|                | <i>Transverse</i> |                        |                        |                |
|----------------|-------------------|------------------------|------------------------|----------------|
|                | <i>n</i>          | Mono EPSC <sub>L</sub> | Poly EPSC <sub>L</sub> | Non-responsive |
| Medial Lumbar  | 17                | 15<br>(88.2%)          | 2<br>(11.8%)           | 0<br>(0%)      |
| Lateral Lumbar | 19                | 2<br>(10.3%)           | 10<br>(52.6%)          | 7<br>(36.8%)   |
| Thoracic       | 11                | 1<br>(9.1%)            | 6<br>(54.4%)           | 4<br>(36.4%)   |
|                | <i>Sagittal</i>   |                        |                        |                |
|                | <i>n</i>          | Mono EPSC <sub>L</sub> | Poly EPSC <sub>L</sub> | Non-responsive |
| Medial Lumbar  | 13                | 9<br>(69.2%)           | 3<br>(23.1%)           | 1<br>(7.7%)    |
| Lateral Lumbar | 16                | 0<br>(0%)              | 3<br>(18.8%)           | 13<br>(81.3%)  |
| Thoracic       | 12                | 1<br>(8.3%)            | 3<br>(25.0%)           | 8<br>(66.7%)   |

**Table 4. Summary of incidences of light-induced excitatory postsynaptic current (EPSC<sub>L</sub>) responses recorded from layer II neurons in *MrgprD*<sup>CreERT2</sup>; *Rosa*<sup>ChR2-EYFP</sup> homozygous and heterozygous mice.** Patch clamp recordings were taken from either transverse or sagittal dSC slices, as indicated. Responses were classified as mono- or polysynaptic (see text). Shaded boxes show the response of the majority (>50%) of recorded cells.
